# Supplementary material for: Enhancements of Airborne Particulate Arsenic over the Subtropical Free Troposphere in the Springtime: Impact by South Asian Biomass Burning
Source: Copernicus journal article supplement (doi:10.5194/acp-2018-108), 2018-04-12
Supplement: Supplementary file 1 [file acp-2018-108-supplement.pdf]

## Supplementary Materials

### **Enhancements of Airborne Particulate Arsenic over the Subtropical Free Troposphere in the Springtime: Impact by South Asian Biomass Burning**

**Yu-Chi Lin<sup>1,2</sup>, Shih-Chieh Hsu<sup>2</sup>, Chuan-Yao Lin<sup>2</sup>, Shuen-Hsin Lin<sup>2</sup>, Yi-Tang  
Huang<sup>1</sup>, Yunhua Chang<sup>1</sup>, Yan-Lin Zhang<sup>1\*</sup>**

*Corresponded to Yan-Lin Zhang (zhangyanlin@nuist.edu.cn ;  
dryanlinzhang@outlook.com)*

This “Supplementary Materials” contains four figures. Figure S1 plots time series of daily concentrations of airborne As, Pb, K<sup>+</sup> in TSP samples and CO observed at Mount Hehuan from September 2011 to September 2012. Figure S2 reveals monthly distributions of fire spot counts observed by MODIS over S Asia and SE Asia from September 2011 to September 2012. Figure S3 plots five-day backward trajectory at Mount Hehuan on (a) April 3, 2012 and (b) March 15, 2012. Figure S4 shows the scattered plots of As against Al observed at Mout Hehuan in (a)SA, (b)SEA and (c)other air groups during the S Asian biomass burning seasons.

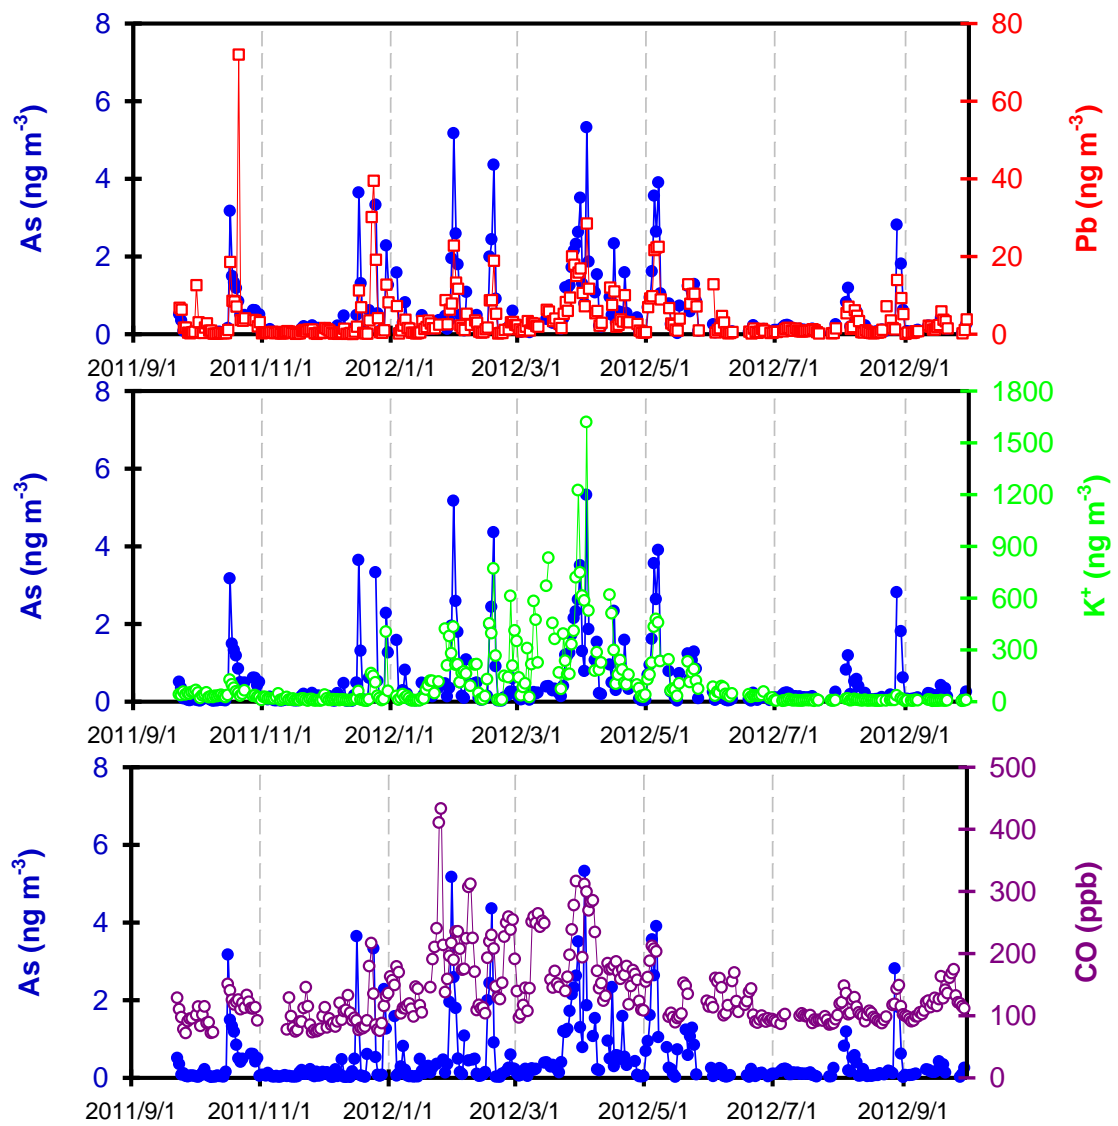

Figure S1

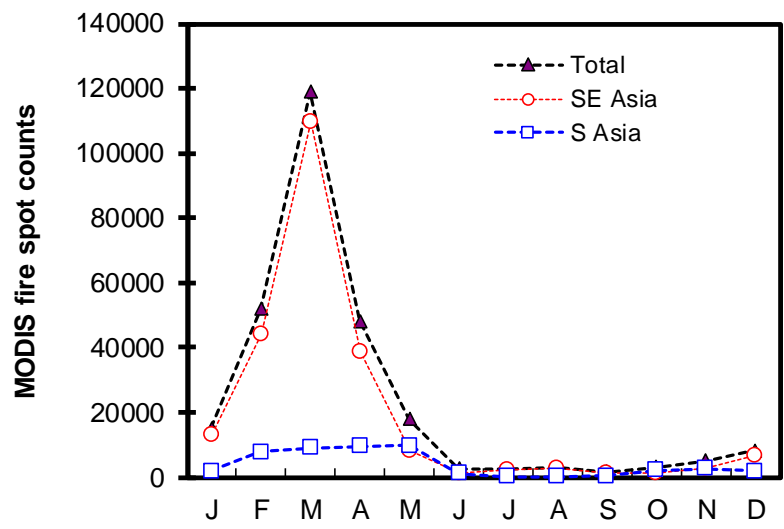

Figure S2

(a)

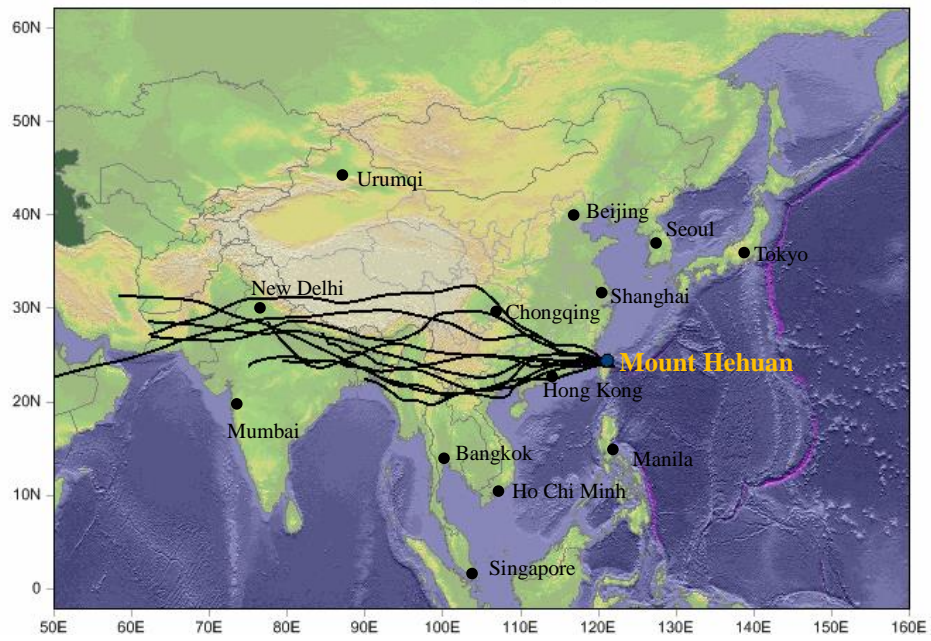

(b)

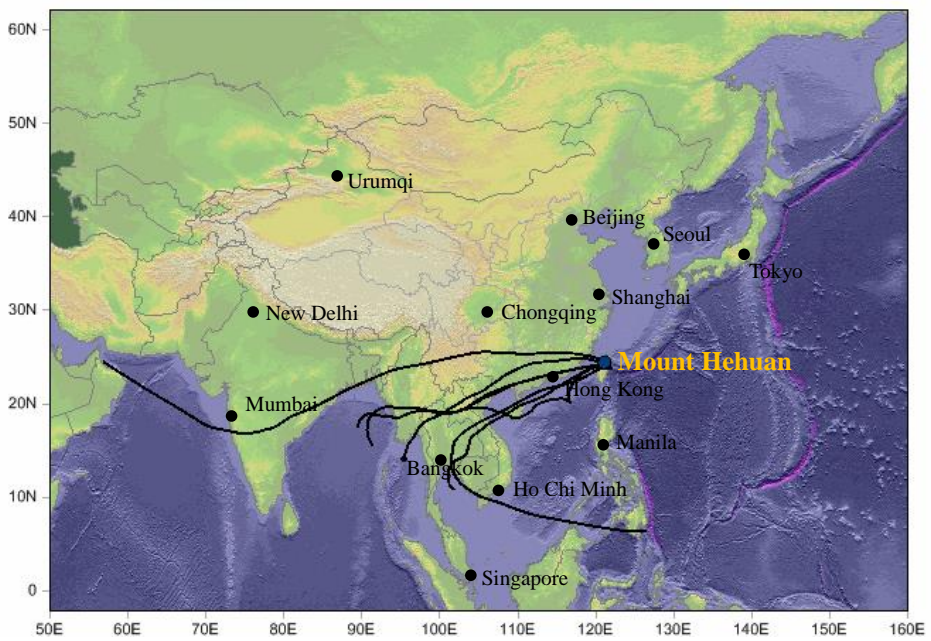

Figure S3

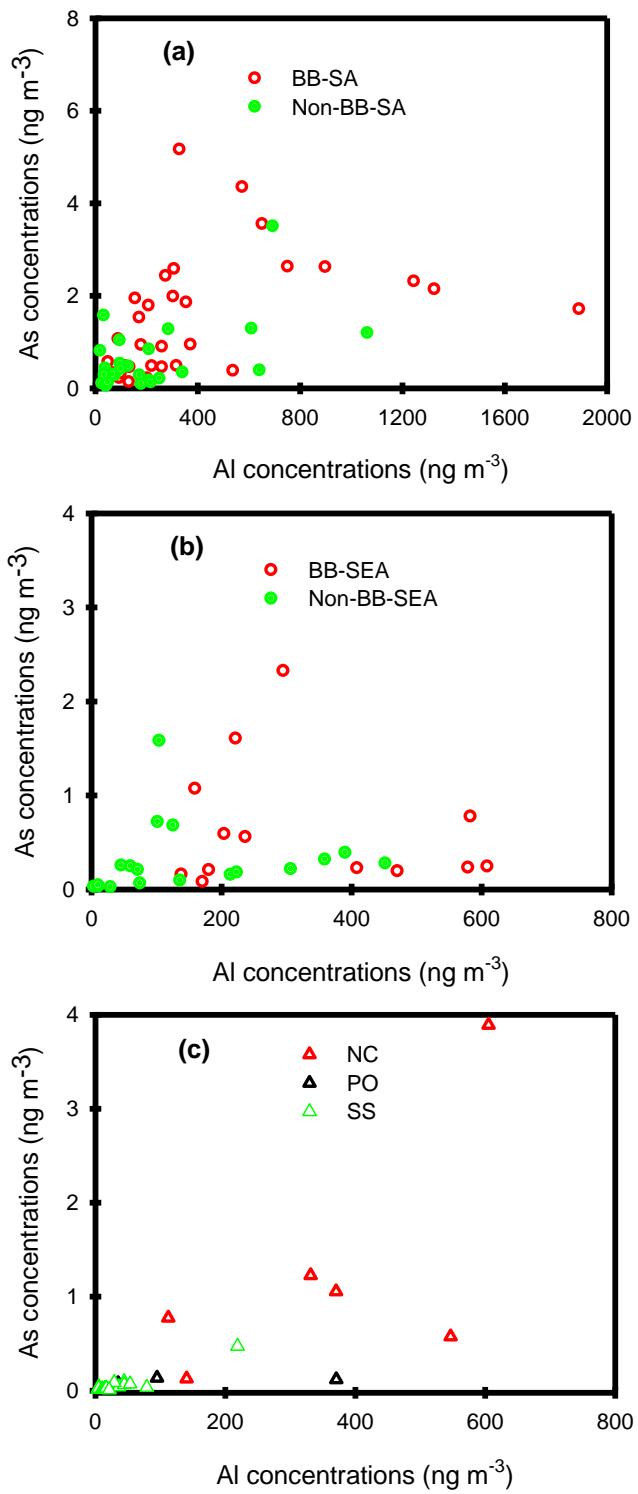

Figure S4
