# Supplementary material for: Enhancements of Airborne Particulate Arsenic over the Subtropical Free Troposphere in the Springtime: Impact by South Asian Biomass Burning
Source: Copernicus journal article supplement (doi:10.5194/acp-2018-108), 2018-04-12
Supplement: Supplementary file [file acp-2018-108-AC1-supplement.pdf]

# ***Interactive comment on “Enhancements of Airborne Particulate Arsenic over the Subtropical Free Troposphere in the Springtime: Impact by South Asian Biomass Burning” by Yu-Chi Lin et al.***

## **Anonymous Referee #1**

Received and published: 10 May 2018

In this work, the authors choose Mount. Hehuan (3000 m asl) in Taiwan as a receptor site to collect the aerosol samples, with the emphasis on the potential long range transport. More than 300 filter samples were collected and analyzed. The authors found that much higher As occurred in Spring compared to other seasons, which was associated with the intensive biomass burning in South Asia. However, the biomass burning in SouthEast Asia (i.e. Indo-China Peninsula) did not release much As. In general, I think this work is well designed. The laboratory analysis (ions and elements), online observation in field (e.g CO) and modelling (WRF-Chem) were integrated from different aspects. And the finding of this work is meaningful for the scientists in the field of atmospheric chemistry and biogeochemical cycling of elements. But there are several

Printer-friendly version

Discussion paper

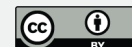

questions still exist in the manuscript and needed to be solved during the revision.

Specific comments: (1) Line 73-74, Actually, besides spring, the intensive biomass burning in India also happened in autumn (from late October to early November), due to the burning of rice (paddy) residue after the harvest. More information could be found in the literature, e.g. Eos, Vol. 95, No. 37, 16 September 2014. Crop Residue Burning: A Threat to South Asian Air Quality. (2) Line 109, Regarding the description of sampling site, it is better to note clearly that it is located in Taiwan. (3) Line 148, what is the recovery of As in the ICP-MS analysis? (4) Line 194, I think there is no need to mention Chongqing here. Maybe a broader geographic area like Sichuan Basin is better. (5) As shown in Fig 8a, during this period, why there is no firespots observed by MODIS in Southeast Asia. And please modify the Hehuanshan into Mount Hehuan in the figures. (6) Line 381, if possible, please provide more details about the usage of lead arsenate(LA) in South Asia, especially in the agricultural sector. What is the total amount of this insecticides used in South Asia every year? (7) In the future, maybe the authors could try to analyze the lead isotope in aerosol samples with high As concentration, to further reveal the source of Pb, as well as its relation to As.

---

Interactive comment on Atmos. Chem. Phys. Discuss., <https://doi.org/10.5194/acp-2018-108>, 2018.

Printer-friendly version

Discussion paper



# ***Interactive comment on “Enhancements of Airborne Particulate Arsenic over the Subtropical Free Troposphere in the Springtime: Impact by South Asian Biomass Burning” by Yu-Chi Lin et al.***

## **Anonymous Referee #2**

Received and published: 10 May 2018

This paper presents one year of daily TSP samples at Mount Hehuan, Taiwan. The samples were analysed for inorganic ions and trace metals and the analysis is supplemented by CO concentration measurements and air mass history analysis.

The manuscript concentrates on the observation of elevated As concentration in biomass burning (BB) plumes. As is found to correlate strongly with Pb, and based on As/Pb ratio of approx. 0.2 the authors suggest that the elevated As concentrations in BB plumes may originate in the usage of lead arsenate pesticide.

While the observation of elevated As in BB plumes is interesting, the concentrations are well below air quality limits at Mount Hehuan. Also the estimated As emission of

[Printer-friendly version](#)

[Discussion paper](#)



0.17 tons per year in South Asian BB is very small (approx. 0.5%) compared to the annual global emissions of 31 tons. Therefore, the results are of only limited interest.

In my opinion this data set requires a more thorough statistical analysis to merit publication in ACP. Please apply principal component analysis (PCA), or a similar factorisation technique, to the data to see if other sources than biomass burning can be identified. Please provide also average concentrations of trace metals and inorganic ions for the different air mass origins you defined. I believe this would provide a valuable reference point for East Asian free troposphere.

Minor comments

L30-35 “Finally, the net influence of BB activities on airborne As concentrations has been simply estimated by comparing the differences of As concentrations between BB and non-BB days. The result showed, on average, the contribution of BB activities over S Asia to airborne As was approximately 1.0 ng m<sup>-3</sup>, which accounted 63% for total airborne As concentrations in the springtime.”

Do you mean that As concentration was on average 1.0 ng m<sup>-3</sup> higher during BB days than non-BB days in the springtime? This is quite a different conclusion than “the contribution of BB activities over S Asia to airborne As was approximately 1.0 ng m<sup>-3</sup>”. Please define springtime and state the BB contribution to As on annual level.

L36-38 “Using this value, arsenic emissions from S Asian BB activities were estimated to be 0.17 tons yr<sup>-1</sup>, causing extremely high airborne As concentrations over the subtropical free troposphere, and impacted As cycles on a regional scale.”

I wouldn't call the concentration “extremely high” as it is below most (if not all) air quality limits. It is high for free troposphere, but much higher average values have been reported from continental boundary layer. Also, 0.17 tons yr<sup>-1</sup> is approx. 0.5% of the global annual emissions, so not a huge amount. However, As in BB smoke may pose a serious health risk close to the fire, where the smoke is not yet diluted.

Printer-friendly version

Discussion paper

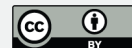

L60-63 “However, whether BB-derived As can be traveled to long distance and influenced As cycles at its downstream regions is still an open question.”

Wai et al. (2016) show that As in general can travel long distances globally. Also it is well known that BB smoke can travel long distances. So it is not a surprise that As released in BB can travel long distances.

L64-65 “volatile organic carbon (VOC) and particulate matters (PM))” Do you mean “volatile organic compounds (VOCs) and particulate matter (PM)” ?

L69 Do you mean “Kondo et al., 2004”? Please check all occurrences of this reference.

L75-77 Most BB smoke is emitted within boundary layer (e.g. Val Martin et al., 2010), though some is of course lifted into free troposphere.

L176 Please explain shortly how the clustering was done. Did you take into account the height of the trajectory?

L209 Please explain which parameters/fields from WRF-Chem did you use in this study. Did you obtain emission sensitivity from the model? Did you take deposition (dry and/or wet) into account?

L231 Are concentrations presented under prevailing conditions or in STP or NTP?

L246-247 “Increased As concentrations coincided with CO peaks on some days, showing some highly anthropogenic As plumes passed over this site.” Please explain what you mean with “highly anthropogenic As plumes”.

L279-286 Please define the enrichment factor in section 2, it belongs to methods.

L287 and Fig. 5. I don’t see much difference between the different seasons in Fig. 5. I think that this is one place where principal component analysis (or similar) would be very useful to differentiate between crustal origins and other sources. See e.g. the analysis by Venter et al. (2017) on trace metal concentrations.

[Printer-friendly version](#)[Discussion paper](#)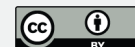

L309-313 “As mentioned above, BB activities may be an important regionally source for high As concentrations over the subtropical free troposphere, especially during the spring period; consequently, in this section, we prove the hypothesis using backward trajectory analyses and MODIS fires observations together with WRF-Chem model simulated results.”

This is quite a strong statement. Given the uncertainties in trajectory calculations, I think the correlation with  $K^+$  is a stronger indicator of BB origin of As. Please consider re-phrasing.

L313 Please state (with appropriate references) which MODIS product you mean by “fire spots”. It would be good to include a sub-section in section 2 detailing which methods are used to characterise BB plumes.

L323-326 “For convenience, prior to further analysis we arbitrarily chose a  $K^+$  concentration of  $109 \text{ ng m}^{-3}$  (the 25th percentile value of potassium ion) as a criterion value for identifying the suspected BB event. A second criterion (CO concentration up to  $160 \text{ ppb}$ ) was also added for selection of the BB plume.”

Do you mean that your site is within a BB plume 75% of time? Using 25th percentile value of  $K^+$  as threshold sounds unrealistic to me. At the same time using CO threshold of  $<160 \text{ ppb}$  sounds very strange. Please explain.

L332-334 Please plot back-trajectories for high-As BB-plumes and low-As BB-plumes on a map separately (e.g. with different colours). Is there a difference in the footprint area? The back-trajectory clusters have substantial overlap.

Here it would be better to define high and low As plumes based on As/CO or As/ $K^+$  ratio. The absolute As concentration in a plume depends strongly on dilution, whereas the above ratios should remain rather constant independent of dilution. Better still to use excess ( $\Delta$ ) As, CO and  $K^+$  to calculate the ratios.

It would be interesting to see if principal component analysis finds a factor with high As

[Printer-friendly version](#)[Discussion paper](#)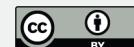

and Pb contributions. Inspecting the air mass history of such a factor should make it very clear where the As plumes originate.

L373-378 What is the As/Pb ratio in the ground water in this region? Is it significantly different from the ratio of 0.22 for lead arsenate?

L428-429 Is the difference calculated correct here? Also, this difference depends mostly on BB plume dilution.

L433-436 Please try to find BB-plume As factor with PCA. That will give you a more reliable estimate of the BB-contribution to As load at Mount Hehuan.

L438 How do you define delta? Is this excess concentration in the plume? This should be introduced already in section 2.

L438-442 Please indicate the unit of delta As / delta K<sup>+</sup> and delta As / delta CO.

L444-445 For an order of magnitude estimate a 15-year old emission inventory is probably ok, but you may wish to use a newer inventory. At least GFED4 (van der Werf et al., 2017) differentiates between agricultural residue burning and other kind of fires.

L457-458 “Backward trajectory and WRF-Chem model proved that the high As plumes originated mainly from S Asia.”

The high As plumes may have originated from S Asia, but in my opinion this has not been proved. Especially Fig. 8, which is the only place where WRF-Chem is utilised, is misleading and poorly documented. Please see comments on Fig. 8 below.

L461-463 “Furthermore, we roughly estimated that approximately 1.0 ng m<sup>-3</sup> of As was contributed by biomass burning activities over the South Asian continent, accounting 63% of total airborne As in the springtime.”

Here “1.0 ng m<sup>-3</sup> of As” sounds strange considering that you present only annual mean (0.5 ng m<sup>-3</sup>) before. Please clarify and state the BB contribution to As on annual level and define “springtime”.

[Printer-friendly version](#)[Discussion paper](#)

Fig. 6 Please explain how the colour coding (As bins) is done. Now it seems to me that “<5th” refers to highest 5 % of values, though usually 5th percentile would include the lowest 5 % of data points.

Fig.8 Caption: “Figure 8 MODIS fires and WRF-Chem modeled results of BB plumes on (a) April 3 and (b) March 25.” Please check if panel (b) presents March 25 or March 15. The “fire spot” legend in the plot suggests March 15 to me.

Please indicate what the blue arrows and the shaded areas represent.

My main concern with this figure is that for panel (a) all fire observations outside India are left out. This gives a very misleading picture of the potential sources of the BB plumes for April 3 observations at Mount Hehuan, as during March 25 – April 3 there are much more fires between India and Taiwan than in India (see attached screenshot from FIRMS).

Also Fig. 8b the “fire spots” are drawn only for a small sub-region of the map.

Finally, there are still quite a few language issues, which should be carefully checked. Please also consider splitting some very long paragraphs into shorter ones (e.g. L166-207 is all just one paragraph).

From the supplement: Please provide proper caption for all figures. Please indicate also here the proper details of MODIS “fire spots”.

## References

Val Martin, M., Logan, J. A., Kahn, R. A., Leung, F.-Y., Nelson, D. L. and Diner, D. J.: Smoke injection heights from fires in North America: analysis of 5 years of satellite observations, *Atmos. Chem. Phys.*, 10(4), 1491–1510, doi:10.5194/acp-10-1491-2010, 2010.

van der Werf, G. R., Randerson, J. T., Giglio, L., van Leeuwen, T. T., Chen, Y., Rogers, B. M., Mu, M., van Marle, M. J. E., Morton, D. C., Collatz, G. J., Yokelson, R. J. and

Printer-friendly version

Discussion paper





Kasibhatla, P. S.: Global fire emissions estimates during 1997–2016, *Earth Syst. Sci. Data*, 9(2), 697–720, doi:10.5194/essd-9-697-2017, 2017.

Venter, A. D., van Zyl, P. G., Beukes, J. P., Josipovic, M., Hendriks, J., Vakkari, V. and Laakso, L.: Atmospheric trace metals measured at a regional background site (Welge-gund) in South Africa, *Atmos. Chem. Phys.*, 17(6), 4251–4263, doi:10.5194/acp-17-4251-2017, 2017.

Wai, K.-H., Wu, S., Li, X., Jaffe, D. J., and Perry, K.D.: Global atmospheric transport and source-receptor relationships for arsenic. *Environ. Sci. Technol.*, 50, 3714-3720, doi:10.1021/acs.est.5b05549, 2016.

---

Interactive comment on *Atmos. Chem. Phys. Discuss.*, <https://doi.org/10.5194/acp-2018-108>, 2018.

Printer-friendly version

Discussion paper

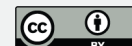

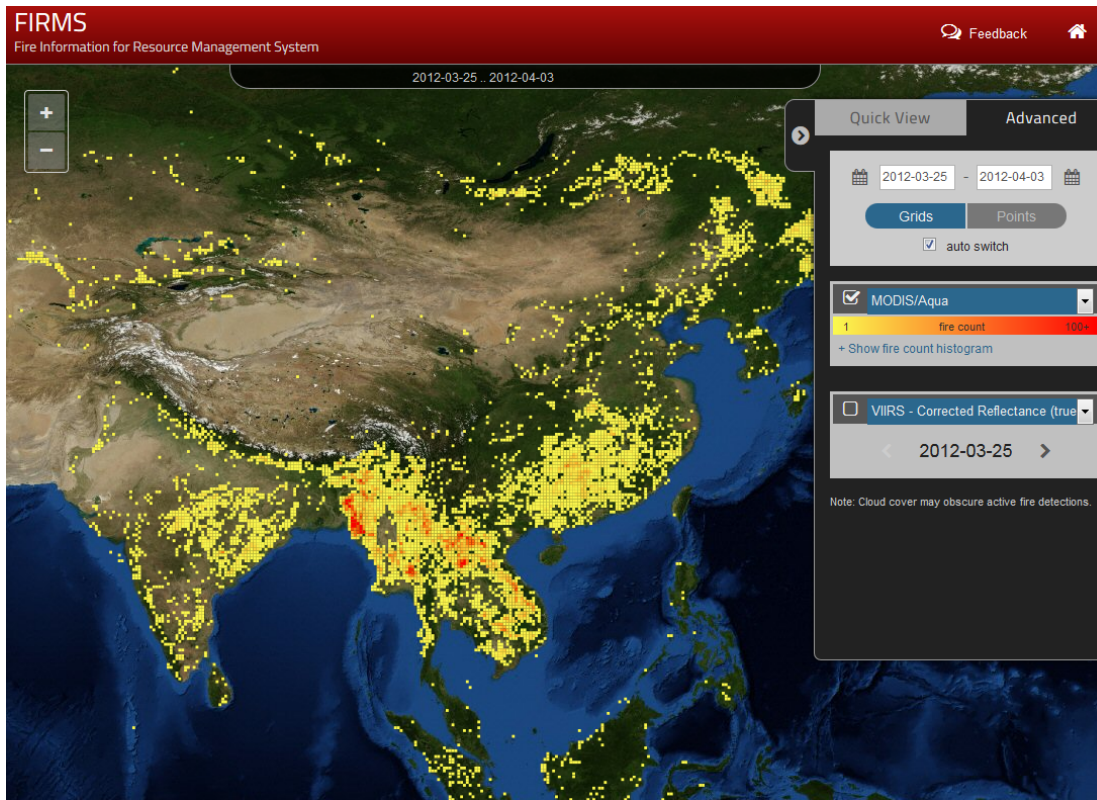

Fig. 1.

Printer-friendly version

Discussion paper

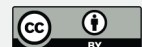

## **Response to reviewer's comments**

### **(Manuscript No. ACP-2018-108)**

#### **Reviewer #1**

In this work, the authors choose Mount. Hehuan (3000 m asl) in Taiwan as a receptor site to collect the aerosol samples, with the emphasis on the potential long range transport. More than 300 filter samples were collected and analyzed. The authors found that much higher As occurred in Spring compared to other seasons, which was associated with the intensive biomass burning in South Asia. However, the biomass burning in South East Asia (i.e. Indo-China Peninsula) did not release much As. In general, I think this work is well designed. The laboratory analysis (ions and elements), online observation in field (e.g CO) and modelling (WRF-Chem) were integrated from different aspects. And the finding of this work is meaningful for the scientists in the field of atmospheric chemistry and biogeochemical cycling of elements. But there are several questions still exist in the manuscript and needed to be solved during the revision.

#### **1<sup>st</sup> comment**

Line 73-74, Actually, besides spring, the intensive biomass burning in India also happened in autumn (from late October to early November), due to the burning of rice (paddy) residue after the harvest. More information could be found in the literature, e.g. Eos, Vol. 95, No. 37, 16 September 2014. Crop Residue Burning: A Threat to South Asian Air Quality

#### **Author's response:**

Thanks for the reviewer's comment. We agree that some fire spots were observed in autumn in India. The biomass burning activities in autumn were probably caused by burning of rice residues. As reported by Pochanart et al. (2003), the fire spots were

much less in autumn season compared to those in spring. On the other hands, the seasonal variations of fire spots observed by MODIS during the sampling period are plotted in Figure S2. As seen, the fire spots over S Asia in the autumn were nearly 2100 which was only 20 % of those (~10000) in the springtime. As a result, significant biomass burning activities over S Asia also maximizes in spring season.

#### **2<sup>nd</sup> comment**

Line 109, Regarding the description of sampling site, it is better to note clearly that it is located in Taiwan.

#### **Author's response:**

In the revised manuscript, we have clearly stated that Mount Hehuan is located in Taiwan. ([lines 115 and 116 on page 5](#))

#### **3<sup>rd</sup> comment**

Line148, what is the recovery of As in the ICP-MS analysis?

#### **Author's response:**

The recovery and precision of As were 106 % and 2 %, respectively. ([lines 155 and 156 on page 7](#))

#### **4<sup>th</sup> comment**

Line 194, I think there is no need to mention Chongqing here. Maybe a broader geographic area like Sichuan Basin is better.

#### **Author's response:**

As suggested, we have replaced “Chongqing” by “Sichuan Basin”. ([line 222 on page 9](#))

### 5<sup>th</sup> comment

As shown in Fig 8a, during this period, why there is no fires pots observed by MODIS in Southeast Asia. And please modify the Hehuanshan into Mount Hehuan in the figures.

#### **Author's response:**

Thanks for the reviewer's comment. We have added all the MODIS fires in study domain in Figs. 7a and 7b in the revised manuscript. On the other hand, we have deleted "Hehuanshan" in this figure. [\(on page 39\)](#)

### 6<sup>th</sup> comment

Line 381, if possible, please provide more details about the usage of lead arsenate (LA) in South Asia, especially in the agricultural sector. What is the total amount of this insecticides used in South Asia every year?

#### **Author's response:**

Thanks for the reviewer's comment. In the revised manuscript, we have added the information of LA as "Lead arsenate (LA,  $[\text{Pb}_5\text{OH}(\text{AsO}_4)_3]$ ; As/Pb~0.22) was the most extensively used as the arsenical insecticides in the world. It was used as an insecticide for gypsy moths invading hardwood forests in 1892. LA can be adhered to the surfaces of plants. Although LA was officially banned as insecticide in 1990's in many developed countries, but has not been banned in India nowadays" [in lines 444 – 449 on page 18](#). Unfortunately, we can't obtain the total amount of this insecticide they used.

### 7<sup>th</sup> comment

In the future, maybe the authors could try to analyze the lead isotope in aerosol samples with high As concentration, to further reveal the source of Pb, as well as its relation to As.

**Author's response:**

Thanks for the reviewer's comment. Lead isotope ratios are good tools to track the potential sources and identify the long-range transported particulate lead in the troposphere. This is a good research direction which we can develop in the future.

## **Response to reviewer's comments**

### **(Manuscript No. ACP-2018-108)**

#### **Reviewer #2**

This paper presents one year of daily TSP samples at Mount Hehuan, Taiwan. The samples were analysed for inorganic ions and trace metals and the analysis is supplemented by CO concentration measurements and air mass history analysis. The manuscript concentrates on the observation of elevated As concentration in biomass burning (BB) plumes. As is found to correlate strongly with Pb, and based on As/Pb ratio of approx. 0.2 the authors suggest that the elevated As concentrations in BB plumes may originate in the usage of lead arsenate pesticide. While the observation of elevated As in BB plumes is interesting, the concentrations are well below air quality limits at Mount Hehuan. Also the estimated As emission of 0.17 tons per year in South Asian BB is very small (approx. 0.5%) compared to the annual global emissions of 31 tons. Therefore, the results are of only limited interest. In my opinion this data set requires a more thorough statistical analysis to merit publication in ACP. Please apply principal component analysis (PCA), or a similar factorization technique, to the data to see if other sources than biomass burning can be identified. Please provide also average concentrations of trace metals and inorganic ions for the different air mass origins you defined. I believe this would provide a valuable reference point for East Asian free troposphere.

#### **Author's response:**

Thanks for the reviewer's comment. In the revised manuscript, we have added the results of principle component analysis (PCA) to qualitatively identify the potential sources of airborne TSP observed at Mount Hehuan (see the author's response to the 12<sup>th</sup> comment and 19<sup>th</sup> comment). We have also added the concentrations of trace metals and inorganic ions in the different air clusters ([see in Table 1 and lines 333 - 350](#))

[on page 14 and lines 351-352 on page 15\).](#)

### **1<sup>st</sup> comment**

L30-35 “Finally, the net influence of BB activities on airborne As concentrations has been simply estimated by comparing the differences of As concentrations between BB and non-BB days. The result showed, on average, the contribution of BB activities over S Asia to airborne As was approximately 1.0 ng m<sup>-3</sup>, which accounted 63% for total airborne As concentrations in the springtime.” Do you mean that As concentration was on average 1.0 ng m<sup>-3</sup> higher during BB days than non-BB days in the springtime? This is quite a different conclusion than “the contribution of BB activities over S Asia to airborne As was approximately 1.0 ng m<sup>-3</sup>”. Please define springtime and state the BB contribution to As on annual level.

### **Author’s response:**

Thanks for the reviewer’s comment. In the revised manuscript, we have re-organized the sentence and deleted the word of “contribution”. The net influence of S Asian BB activities on airborne As concentrations has been estimated by comparing the differences of As concentrations between BB and non-BB days. On average, the difference of As concentrations on the BB and non-BB days was 1.0 ng m<sup>-3</sup>, which accounted 63 % for the average As concentration on BB days during the S and SE Asian BB periods ([lines 39-41 on page 2](#)). This finding indicated that S Asian BB activities was a dominant source for high As concentrations during the S and SE Asian BB seasons.

### **2<sup>nd</sup> comment**

L36-38 “Using this value, arsenic emissions from S Asian BB activities were estimated to be 0.17 tons yr<sup>-1</sup>, causing extremely high airborne As concentrations over the



subtropical free troposphere, and impacted As cycles on a regional scale.” I wouldn’t call the concentration “extremely high” as it is below most (if not all) air quality limits. It is high for free troposphere, but much higher average values have been reported from continental boundary layer. Also, 0.17 tons yr<sup>-1</sup> is approx. 0.5% of the global annual emissions, so not a huge amount. However, As in BB smoke may pose a serious health risk close to the fire, where the smoke is not yet diluted.

**Authors response:**

Thanks for the reviewer’s comment. In the revised manuscript, we have re-organized the abstract and deleted “extremely high” in the abstract.

**3<sup>rd</sup> comment**

L60-63 “However, whether BB-derived As can be traveled to long distance and influenced As cycles at its downstream regions is still an open question.” Wai et al. (2016) show that As in general can travel long distances globally. Also it is well known that BB smoke can travel long distances. So it is not a surprise that As released in BB can travel long distances.

**Authors response:**

In the revised manuscript, we have rephrased the sentence of “However, whether As could be.....” to “However, the influence of .....is well not understood”. ([lines 67 and 68 on page 3](#))

**4<sup>th</sup> comment**

L64-65 “volatile organic carbon (VOC) and particulate matters (PM))” Do you mean “volatile organic compounds (VOCs) and particulate matter (PM)” ?

**Author’s response:**

That is a typo. We have corrected “volatile organic carbon (VOC)” to “volatile organic

compounds (VOCs)” in [lines 70 and 71 on page 3](#).

**5<sup>th</sup> comment**

L69 Do you mean “Kondo et al., 2004”? Please check all occurrences of this reference.

**Author’s response:**

Thanks for the reviewer’s comment. We have corrected “Kondo et al., 2003” to “Kondo et al., 2004” ([line 75 on page 3 and line 85 on page 4](#)) and checked all occurrences of this reference.

**6<sup>th</sup> comment**

L75-77 Most BB smoke is emitted within boundary layer (e.g. Val Martin et al., 2010), though some is of course lifted into free troposphere.

**Author’s response:**

Thanks for the reviewer’s comment. We agree that most BB smoke is emitted within boundary layer, though some is of course lifted into free troposphere ([lines 81-85 on page 4](#)). In the revised manuscript, we have added the reference done by Val Martin et al. (2010) in [line 85 on page 4](#) and in references lists [on page 27](#).

**7<sup>th</sup> comment**

L176 Please explain shortly how the clustering was done. Did you take into account the height of the trajectory?

**Author’s response:**

Thanks for the reviewer’s comment. To identify the potential sources of particulate arsenic observed at Mount Hehuan, five-day backward trajectory starting at 3000 m a.s.l. were computed at 12:00 LT once every day with a time step of 6 hours. Most air parcels started from the originated regions with the altitude of approximately 6000 m

and then descended to the receptor site. During the sampling period, a total of 1865 backward trajectories were computed during the sampling periods. According the originated regions of air parcels, we divided the trajectories into five groups, namely, Northern China (NC), Pacific Ocean (PO), South Sea (SS), Southeast Asia (SEA) and South Asia (SA). ([lines 203-206 on page 9](#))

**8<sup>th</sup> comment**

L209 Please explain which parameters/fields from WRF-Chem did you use in this study. Did you obtain emission sensitivity from the model? Did you take deposition (dry and/or wet) into account?

**Author's response:**

As suggested, we have added the brief introduction of parameters from WRF-Chem model in the revised manuscript. In this study, a tracer module in WRF-Chem developed by Lin et al (2009) was employed to identify the transport of BB plumes. This model has been successfully simulated and identified the biomass burning transportation from S and SE Asia (Chi et al. 2010; Lin et al. 2009; 2014). The tracers were assigned to the fire locations derived from MODIS satellite data over the study domain. They were placed at the first level above the surface at each fire location with a concentration of 1 unit per day. The dry and wet deposition functions are considered in the model. ([lines 238-246 on page 10](#))

**9<sup>th</sup> comment**

Are concentrations presented under prevailing conditions or in STP or NTP?

**Author's response:**

Thanks for the reviewer's comment. All the concentrations are presented under prevailing conditions. ([lines 273 and 274 on page 11](#))

### **10<sup>th</sup> comment**

L246-247 “Increased As concentrations coincided with CO peaks on some days, showing some highly anthropogenic As plumes passed over this site.” Please explain what you mean with “highly anthropogenic As plumes”

#### **Author’s response:**

Thanks for the reviewer’s comment. CO is a good indicator of anthropogenic emissions. As investigated by Streets et al. (2003), the annual emissions of CO in Asia was 279 Tg. Apart from vehicle emissions, coal use, fuel combustion and industries were also important sources for CO. In this work, we found some increased As coincide with enhanced CO, but K<sup>+</sup> (a tracer for biomass burning) concentrations did not increase. This indicates that As was not contributed by biomass burning. However, we can’t identify the potential source for As in these high CO events. Consequently, in the revised manuscript, we have omitted the sentence.

### **11<sup>th</sup> comment**

L279-286 Please define the enrichment factor in section 2, it belongs to methods.

#### **Author’s response:**

In the 12th comment, the reviewer thought PCA is better to identify the aerosol sources than enrichment factor (EF) analysis. Thus, we have deleted all parts relevant to EF analysis in the revised manuscript.

### **12<sup>th</sup> comment**

L287 and Fig. 5. I don’t see much difference between the different seasons in Fig. 5. I think that this is one place where principal component analysis (or similar) would be very useful to differentiate between crustal origins and other sources. See e.g. the analysis by Venter et al. (2017) on trace metal concentrations.

**Author's response:**

As suggested, the enrichment factor analysis has been replaced by principal component analysis in the revised manuscript. ([lines 172-175 on page 7, lines 176-190 on page 8, lines 333-350 on page 14 and lines 351-352 on page 15 along with Table 1](#))

**13<sup>th</sup> comment**

L309-313 “As mentioned above, BB activities may be an important regionally source for high As concentrations over the subtropical free troposphere, especially during the spring period; consequently, in this section, we prove the hypothesis using backward trajectory analyses and MODIS fires observations together with WRF-Chem model simulated results”. This is quite a strong statement. Given the uncertainties in trajectory calculations, I think the correlation with K<sup>+</sup> is a stronger indicator of BB origin of As. Please consider re-phrasing.

**Author's response:**

Thanks for the reviewer's comment. Actually, we did correlation analysis between As and K<sup>+</sup> for different As bin values. As shown in Figure 5, significant correlations ( $r = 0.78$ ,  $p < .05$  for the 95th percentile value of As) between As and K<sup>+</sup> when high As concentrations occurred. Since K<sup>+</sup> is a good indicator for biomass burning; and therefore, high As concentrations might be emitted from BB activities. ([353-356 on page 15](#))

**14<sup>th</sup> comment**

L313 Please state (with appropriate references) which MODIS product you mean by “fire spots”. It would be good to include a sub-section in section 2 detailing which methods are used to characterise BB plumes.

**Author's response:**

As suggested, we have added the section 2.6 to give the introduction of MODIS fire spots we obtained during the sampling period. ([lines 254-264 on page 11](#))

**15<sup>th</sup> comment**

L323-326 “For convenience, prior to further analysis we arbitrarily chose a K<sup>+</sup> concentration of 109 ng m<sup>-3</sup> (the 25th percentile value of potassium ion) as a criterion value for identifying the suspected BB event. A second criterion (CO concentration up to 160 ppb) was also added for selection of the BB plume.” Do you mean that your site is within a BB plume 75% of time? Using 25th percentile value of K<sup>+</sup> as threshold sounds unrealistic to me. At the same time using CO threshold of <160ppb sounds very strange. Please explain.

**Author's response:**

Thanks for the reviewer's comment. Actually, we chose a K<sup>+</sup> concentrations of > 109 ng m<sup>-3</sup> (75th percentile value) and a CO concentration of > 160 ppb (75th percentile value) as threshold values to identify the suspected BB samples. The 75th percentile values for both species can be representative of high K<sup>+</sup> and CO conditions and used to select the suspected BB samples. In the revised manuscript, we have corrected these sentences ([lines 376-379 on page 15](#)). Meanwhile, we have also corrected the statements in Figure 4a ([on page 36](#)).

**16<sup>th</sup> comment**

L332-334 Please plot back-trajectories for high-As BB-plumes and low-As BB-plumes on a map separately (e.g. with different colours). Is there a difference in the footprint area? The back-trajectory clusters have substantial overlap. Here it would be better to define high and low As plumes based on As/CO or As/K ratio. The absolute As

concentration in a plume depends strongly on dilution, whereas the above ratios should remain rather constant independent of dilution. Better still to use excess ( $\Delta$ ) As, CO and  $K^+$  to calculate the ratios. It would be interesting to see if principal component analysis finds a factor with high As and Pb contributions. Inspecting the air mass history of such a factor should make it very clear where the As plumes originate.

**Author's response:**

Thanks for the reviewer's comment. As suggested, we have added the plot to illustrate backward trajectories for the cases of high-As and low-As plumes on a map separated with different colors as seen in Figure S3. On the other hand, we agreed the reviewer's comment that the absolute As concentration might be diluted during their transport. We also calculate the As/CO and As/ $K^+$  for the all data sets. Unfortunately, As did not correlate well with As/ $K^+$  ( $R^2 = 0.03$ ,  $p > .05$ ). This might be explained by the different/additional emission sources for the two species picked up by air masses during their long-range transport, especially during the periods between July to December. This also reflect that the ratios of As/ $K^+$  may not suitable to identify the high-/low As plumes. Thus, we still use the absolute As concentrations to identify the high As events and attempt to investigate their potential sources. Moreover, we also use PCA to check the As sources over Mount Hehuan. The result showed that a high loading of  $K^+$  (0.71) and a moderate loading of CO (0.50) in the PC2 during the S and SE Asian BB periods, indicating BB origins. Meanwhile, a moderate of As (0.67) was also found in this factor. This implies that As was mainly from BB activities during the S and SE Asian BB seasons. ([lines 333-350 on page 14 and lines 351-352 on page 15](#))

**17<sup>th</sup> comment**

L373-378 What is the As/Pb ratio in the ground water in this region? Is it significantly different from the ratio of 0.22 for lead arsenate?

**Author's response:**

Thanks for the reviewer's comment. We have collected some papers about distributions of trace metals in ground water over this region (Ali et al., 2016, Environmental Nanotechnology, Monitoring and Management; Islam et al., 2017, Marine Pollution Bulletin; Islam et al., 2017, Chemosphere). The As/Pb ratios in ground water over this region are not constant levels. They range widely from 0.04 to 0.22 in the ground water and from 0.13 to 0.58 in the sediments of rivers over this region. However, the As/Pb ratio of LA is within the range of these values.

**18<sup>th</sup> comment**

L428-429 Is the difference calculated correct here? Also, this difference depends mostly on BB plume dilution.

**Author's response:**

Thanks for the reviewer's comment. We agree the reviewer's comment, that is, the difference depends mostly on the dilution of BB plume. However, based on the observed data, we can only use the difference of As concentrations between BB and non-BB days to roughly estimate the net influence of BB activities over S and SE Asia on arsenic concentrations in the subtropical free troposphere through uncertainties were existed in the estimations (Kato et al., 2002; Lin et al., 2009).

**19<sup>th</sup> comment**

L433-436 Please try to find BB-plume As factor with PCA. That will give you a more reliable estimate of the BB-contribution to As load at Mount Hehuan.

**Author's response:**

As suggested, we have added PCA analysis in sections 2.3 and 3.2 in the revised manuscript. For the PCA results, we can clearly see that BB activity was one of the



major sources of airborne TSP at Mount Hehuan site during the S and SE Asian biomass burning seasons (from January to May). The explained variance of this factor was approximately 26 %. Interestingly, moderate loadings of As and Pb were also found in this factor, indicating that As and Pb were from BB activities. In contrast, high loadings of As and Se were found in PC 2 (explained variance was 17 %) during the non-BB periods (from June to December), suggesting that As was mainly from coal-combustion. ([lines 333-350 on page 14 and lines 351-352 on page 15 along with Table 1](#))

#### **20<sup>th</sup> comment**

L438 How do you define delta? Is this excess concentration in the plume? This should be introduced already in section 2.

#### **Author's response:**

We roughly identified  $\Delta K^+$ ,  $\Delta CO$  and  $\Delta As$  as the differences of concentrations in  $K^+$ , As and CO between BB and non-BB days in S and SEA air clusters. Subsequently, we can obtain the ratios of  $\Delta K^+/\Delta CO$  and  $\Delta As/\Delta CO$  and estimate the  $K^+$  or As emissions from BB activities over S and SE Asia. In our estimation, the emission rates of As from BB activities over S Asia was 0.17 tons per year. ([lines 499-500 on page 20 and lines 501-505 on page 21](#))

#### **21<sup>th</sup> comment**

L438-442 Please indicate the unit of delta As / delta K+ and delta As / delta CO.

#### **Author's response:**

Thanks for the reviewer's comment. To obtain the  $\Delta K^+/\Delta CO$  and  $\Delta As/\Delta CO$ , we first convert the units of  $K^+$  and As from  $ng\ m^{-3}$  to ppb based on the airborne temperature at Mount Hehuan and molecular weights of  $K^+$  (39) and As (75). Thus, we can obtain

the  $\Delta K^+/\Delta CO$  and  $\Delta As/\Delta CO$  without units. ([lines 499-500 on page 20 and line 501-503 on page 21](#))

### **22<sup>th</sup> comment**

L444-445 For an order of magnitude estimate a 15-year old emission inventory is probably ok, but you may wish to use a newer inventory. At least GFED4 (van der Werf et al., 2017) differentiates between agricultural residue burning and other kind of fires.

### **Author's response:**

As suggested, we have cited the paper published by van der Werf et al. (2017) in the revised manuscript ([lines 78-79 on page 3](#)) and reference lists. van der Werf et al. (2017) quantified the global fire emission patterns during 1997 – 2016. They also estimated the carbon and CO emissions from burned activities for different regions during 1997-2011 (GFED3) and 1997-2016 (GFED4), and compared their differences. Unfortunately, they did not separate the CO emissions produced by biomass burning over Indian Subcontinent from Southeast Asia (including Indian Subcontinent and Indo-China Peninsula). Thus, the arsenic emissions (calculated by  $\Delta K^+/\Delta CO$ ) from biomass burning over S Asia were still calculated based on the CO emission data investigated by Stresst et al. (2003) in this work.

### **23<sup>th</sup> comment**

L457-458 “Backward trajectory and WRF-Chem model proved that the high As plumes originated mainly from S Asia.” The high As plumes may have originated from S Asia, but in my opinion this has not been proved. Especially Fig. 8, which is the only place where WRF-Chem is utilised, is misleading and poorly documented. Please see comments on Fig. 8 below.

**Author's response:**

Thanks for the reviewer's comment. In the revised manuscript, we have re-plotted this figure (new Figure 7) and the details are seen in the response to 26th comment.

**24<sup>th</sup> comment**

L461-463 "Furthermore, we roughly estimated that approximately 1.0 ng m<sup>-3</sup> of As was contributed by biomass burning activities over the South Asian continent, accounting 63% of total airborne As in the springtime." Here "1.0 ng m<sup>-3</sup> of As" sounds strange considering that you present only annual mean (0.5 ng m<sup>-3</sup>) before. Please clarify and state the BB contribution to As on annual level and define "springtime".

**Author's response:**

Thanks for the reviewer's comment. The same response can be seen in 1<sup>st</sup> comment.

**25<sup>th</sup> comment**

Fig. 6 Please explain how the colour coding (As bins) is done. Now it seems to me that "<5th" refers to highest 5 % of values, though usually 5th percentile would include the lowest 5 % of data points.

**Author's response:**

Thanks for the reviewer's comment. We agree that 5th percentile value would include the lowest 5% of data points. In the revised manuscript, we have corrected the statements of legend in Figure 4 and also corrected all mistakes throughout the paper.

[\(lines 301-302 on page 13, lines 327 on page 14 and lines 355 and 359 on page 15, and line 377 on page 16\)](#)

## 26<sup>th</sup> comment

Fig.8 Caption: “Figure 8 MODIS fires and WRF-Chem modeled results of BB plumes on (a) April 3 and (b) March 25.” Please check if panel (b) presents March 25 or March 15. The “fire spot” legend in the plot suggests March 15 to me. Please indicate what the blue arrows and the shaded areas represent. My main concern with this figure is that for panel (a) all fire observations outside India are left out. This gives a very misleading picture of the potential sources of the BB plumes for April 3 observations at Mount Hehuan, as during March 25 – April 3 there are much more fires between India and Taiwan than in India (see attached screenshot from FIRMS). Also Fig. 8b the “fire spots” are drawn only for a small sub-region of the map.

### Author’s response:

Thanks for the reviewer’s comment. We have re-plotted the new Figure 7 in the revised manuscript. In this figure, we have added all the fire spots observed by MODIS in the study domain ranging from 5 to 40 °N and 65 to 135 °E. In this figure, we show the simulated results by WRF-Chem model on (a) April 3 and (b) March 15. In Figure 7 (a), extensive fire spots were observed over India-subcontinent, Indo-China Peninsula and Southern China from March 25 to April 2. As computed by HYSPLIT model, the air parcels were mainly from Indian Subcontinent (see in Figure S4a), and therefore the tracers were assigned to the fire locations derived from MODIS satellite data over Indian Subcontinent ranging from 5 to 38 °N and 65 to 90 °E and they were placed at the surface level above the surface at each fire location with the concentration of a unit per day. The result showed that the significant BB plume originated over burned areas, transporting to east direction, and passed over Mount Hehuan ([lines 395-400 on page 16 and lines 401-402 on page 17](#)). In Figure 7 (b), the tracers were placed at the surface level above the surface at each fire location in the Indo-China Peninsula ranging from 5 to 30 °N and 90 to 110 °E since the backward trajectories originated mainly from

Indo-China Peninsula. As seen, the WRF-Chem model showed that the significant tracer concentration laid in northeast-southwest belt and covered Taiwan on March 15.

[\(lines 411-416 on page 17\)](#)

**27<sup>th</sup> comment**

Finally, there are still quite a few language issues, which should be carefully checked.

Please also consider splitting some very long paragraphs into shorter ones (e.g. L166-207 is all just one paragraph).

**Author's response:**

Thanks for the reviewer's comment. In the revised manuscript, we have checked the language and split the very long paragraph shorter ones.

**28<sup>th</sup> comment**

From the supplement: Please provide proper caption for all figures. Please indicate also here the proper details of MODIS "fire spots".

**Author's response:**

Thanks for the reviewer's comment. We have provided proper captions for all figures and details of MODIS "fire spots" in supporting materials.

1 **Enhancements of Airborne Particulate Arsenic over the Subtropical**  
2 **Free Troposphere: Impact by South Asian Biomass Burning**

3 **Yu-Chi Lin<sup>1,2,3</sup>, Shih-Chieh Hsu<sup>3</sup>, Chuan-Yao Lin<sup>3</sup>, Shuen-Hsin Lin<sup>3</sup>, Yi-Tang**  
4 **Huang<sup>3</sup>, Yunhua Chang<sup>1,2</sup>, Yan-Lin Zhang<sup>1,2\*</sup>**

5 <sup>1</sup> *Yale-NUIST Center on Atmospheric Environment, Nanjing University of Information*  
6 *Science and Technology, Nanjing, Jiangsu, China.*

7 <sup>2</sup> *Key Laboratory of Meteorological Disaster, Ministry of Education & Collaborative*  
8 *Innovation Center on Forecast and Evaluation of Meteorological Disasters, Nanjing*  
9 *University of Information Science and Technology, Nanjing, Jiangsu, China.*

10 <sup>3</sup> *Research Center for Environmental Changes (RCEC), Academia Sinica, Taipei,*  
11 *Taiwan, R.O.C.*

12  
13 *Corresponded to Yan-Lin Zhang (zhangyanlin@nuist.edu.cn ;*  
14 *dryanlinzhang@outlook.com)*

15  
16 **ABSTRACT**

17 Arsenic (As) has long been recognized as a toxic element of mainly  
18 anthropogenic origins, having adverse effects on human health. However, there is  
19 insufficient understanding regarding As released into atmosphere from biomass  
20 burning (BB). To this end, daily airborne As concentrations in total particulate matter  
21 (TSP) were determined at Mount Hehuan (24.16°N, 121.29°E, 3001 m a.s.l.), Taiwan  
22 from September 2011 to September 2012. During the sampling period, As  
23 concentrations varied from 0.02 to 5.9 ng m<sup>-3</sup>, with a mean value of 0.5 ± 1.0 ng m<sup>-3</sup>.  
24 Significant seasonal variations of As were found over the subtropical free troposphere,  
25 and **higher As concentrations were observed in the South (S) and Southeast (SE)**

26 Asian BB seasons (from January to May). Principal component analysis (PCA) results  
27 showed that BB activities seemed to be a major source for As during the S and SE  
28 Asian BB periods, which was very distinct from the source of coal-fired power plant  
29 during the periods between July and December. Based on backward trajectory  
30 analyses and WRF-Chem model simulations, we found the high As concentrations  
31 during the BB periods were attributed to the biomass burning activities over S Asia  
32 where ground water, soil and crops are severely contaminated by arsenic. A good  
33 correlation ( $r = 0.73$   $p < .05$ ) between As and potassium ion ( $K^+$ , a chemical tracer of  
34 BB activities) in S Asian BB events also supported this hypothesis. During the S  
35 Asian BB events, the high As/Pb ratios ( $> 0.2$ ) were also observed, indicating that  
36 burning crops contaminated by lead arsenate might be a crucial candidate for high As  
37 concentrations at Mount Hehuan. Nevertheless, the net influence of S Asian BB  
38 activities on airborne As concentrations has been estimated by comparing the  
39 differences of As concentrations between BB and non-BB days. On average, the  
40 difference of As concentrations on the BB and non-BB days was  $1.0 \text{ ng m}^{-3}$ , which  
41 accounted 63 % for the average As concentration on BB days. Moreover, a ratio of  
42  $\Delta\text{As}/\Delta\text{CO}$  ( $\sim 0.00001$ ) in the S Asian BB events was obtained. Using this value,  
43 arsenic emissions from S Asian BB activities were estimated to be  $0.17 \text{ tons yr}^{-1}$ ,  
44 resulting in high airborne As concentrations over the subtropical free troposphere, and  
45 impacted As cycles on a regional scale in the S and SE BB seasons.

46

47 Key words: Arsenic; Subtropical free troposphere; South Asia; Biomass burning;

48 As/Pb ratios.

49

50 **1. Introduction**

51 Arsenic (As), categorized into carcinogenic species by International Agency for  
52 Research on Cancer, is a toxic element and even in trace concentration may exert  
53 hazard to human health. It is also the most highly accumulated trace metal in the  
54 human food chain. Consequently, As has been an environmental concern in terms of  
55 its emissions, cycling and health effects (Nriagu, 1989; Bissen and Frimmel, 2003;  
56 Wai et al., 2016). Atmospheric arsenic is released from both natural and  
57 anthropogenic sources with a total annually global emission of nearly 31 Gg (Nriagu,  
58 1989; Wai et al., 2016; Walsh et al., 1979). The quantity of As emissions derived from  
59 anthropogenic sources is about 1.6 times higher than that of natural origins (Nriagu,  
60 1989). Arsenic released from volcano is the predominant source of natural emissions,  
61 followed by wind-erosion soil particles as well as biogenic emissions (Nriagu, 1989).  
62 For anthropogenic sources, metal smelting and coal combustion release quantities of  
63 arsenic into atmosphere (Brimblecombe, 1979; Mandal and Suzuki, 2002), and  
64 thereby are considered to be major origins for airborne arsenic. Besides, biomass  
65 burning (BB) for waste timber treated by As-contained insecticides and crops  
66 contaminated by pesticide might enhance the emissions of airborne particulate arsenic  
67 (Huang et al., 2012; Niyobuhungiro and Blottnitz, 2013). **However, the influence of**  
68 **BB activities on As concentrations over the free troposphere is well not understood.**

69 Biomass burning activity emits large amounts of air pollutants into atmosphere  
70 (e.g. carbon monoxide (CO), carbon dioxide (CO<sub>2</sub>), nitrogen oxides (NO<sub>x</sub>), **volatile**  
71 **organic compounds (VOCs)** and particulate matters (PM)) (Streets et al., 2003 ; Tang  
72 et al., 2003). It impacts not only on local but also on regional air quality, atmospheric  
73 chemistry, biogeochemical process and hydrological cycle along with climate  
74 (Crutzen and Andreae, 1990; Ramanathan, 2001; Pochanart et al., 2003; Tang et al.,  
75 2003; **Kondo et al., 2004**). Southeast (SE) and South (S) Asia are active biomass



76 burning regions in the world and BB activities in these continents are mostly caused  
77 by deforestation and agricultural activities. **Indonesia, India, Myanmar and Cambodia**  
78 **are major countries of BB activities (Chang and Song, 2010; van der Werf et al.,**  
79 **2017).** Among these burned areas, BB activities in India are mainly caused by burning  
80 of crop residues (~61% of total burning) and frequently occur from January to May  
81 and usually maximizes in springtime (Nriagu, 1989; Pochanart et al., 2003). **Most BB**  
82 **smokes are emitted within boundary layer. After burning, some BB plumes would**  
83 **uplift from ground level to free troposphere (2-6 km), transporting to the Pacific**  
84 **region by prevailing westerly wind, and then impact on atmospheric chemistry in the**  
85 **downwind regions (Kondo et al., 2004; Lin et al., 2009; Val Martin et al., 2010).**

86 Over the past decade, numerous studies have shown that west Bengal of India  
87 and Bangladesh are extremely As-contaminated areas in South Asia (Robert et al.,  
88 2010; Neumann et al., 2010; Burgess et al., 2010). The extremely As-contaminated  
89 ground water in these areas is used for both drinking and irrigation. Thus,  
90 accumulation of As would be found in rice roots and rice plants along with crop soils  
91 (Norra et al., 2005). While burning As-contaminated plants, As would be expected to  
92 attach within BB-originated aerosols and probably condense on the existing aerosols,  
93 and transport to the downwind site, enhancing the atmospheric As concentrations in  
94 aerosol phase (Huang et al., 2012).

95 Mountain-top site, which is generally situated far away from direct influence of  
96 local anthropogenic emissions, is very sparsely in the Northern Hemisphere. Due to  
97 the high elevation, mountain-top site is useful to monitor long-range transported air  
98 pollutions (Weiss-Penizas et al., 2007; Lin et al., 2013). From September 2011 to  
99 September 2012, the continuous measurements of total suspended particulate (TSP,  
100 dynamic diameter less than 100  $\mu\text{m}$ ), ozone and carbon monoxide were carried out at

101 Mountain Hehuan in Taiwan, with the aim to better understand the behaviors of air  
102 pollutants transported horizontally from Asian continent and intruded vertically from  
103 high-troposphere/low-stratosphere over the subtropical region. Chemical  
104 compositions of TSP samples, including water-soluble ions and elements, were  
105 analyzed. In this paper, we present the As concentrations and its seasonality at Mount  
106 Hehuan. The potentially regional sources of high As concentrations are also examined  
107 by backward trajectory analyses and WRF-Chem model simulations. Finally, the net  
108 influence of SE and S Asian BB activities on airborne As over the subtropical free  
109 troposphere is assessed. To our best knowledge, this is the first paper to report  
110 regionally transported arsenic accompanying with BB plumes and enhancements in  
111 airborne As concentrations over the subtropical free troposphere.

112

## 113 **2. Method**

### 114 **2.1 Aerosol sampling**

115 **Daily TSP samples were collected at Mount Hehuan site, Taiwan (24.16 °N,**  
116 **121.29 °E, 3001 m a.s.l., see in Figure 1) from September 2011 to September 2012.**

117 The sampling station is located in a pristine environment and its vicinity is generally  
118 higher than 2900 m, and thereby the monitoring site can be considered as  
119 representative of the free troposphere over the subtropical Pacific region (Lin et al.,  
120 2013). A high-volume TSP sampler (TISCH, Model TE-5170D), operated at a flow  
121 rate of approximately  $1.13 \text{ m}^3 \text{ min}^{-1}$ , was used to collect aerosol samples.  
122 Whatman®41 cellulose filters (8" × 10") were used as filtration substrates. After  
123 sampling, each filter was folded and stored in a separate plastic bag that was then  
124 stored in a polypropylene container, frozen immediately, and returned to the  
125 laboratory for further chemical analysis. Carbon monoxide, a tracer for tracking

126 anthropogenic plumes, was monitored by a nondispersive infrared spectrometer  
127 (Horiba model APMA-370). The details of the instrument and QA/QC procedure for  
128 CO monitoring are described elsewhere (Lin et al., 2013).

129

## 130 *2.2 Chemical Analysis*

131 For the purpose of chemical analyses, the sampled filter was subdivided into  
132 eight equal pieces after sampling. One piece was subjected to acidic digestion for  
133 elemental determination and another one was extracted by Milli-Q water for  
134 analyzing water-soluble ions. For acidic digestion, each filter sample was put into an  
135 acid-cleaned vessel and digested in a mixed acidic solution (4 mL 60 % HNO<sub>3</sub> + 2 mL  
136 48 % HF) by an ultrahigh throughput microwave digestion system (MARSXpress,  
137 CEM Corporation, Matthews, NC, USA). The digestion process was performed in  
138 three steps: (1) heating to 170 °C for 8 min and maintaining this temperature for 7  
139 min at 1440 W, (2) heating to 200 °C for 7 min and maintaining this temperature for  
140 15 min at 1600 W, and (3) cooling for 60 min. Subsequently, the vessel was  
141 transferred to XpressVap<sup>TM</sup> accessory sets (CEM Corporation) for the evaporation of  
142 the remaining acids until nearly dry. Approximately 2 mL concentrated HNO<sub>3</sub> was  
143 added into the vessel and reheated. The resulting solution was then diluted with  
144 Milli-Q water to a final volume of 50 mL. After acidic digestion, 31 target elements in  
145 TSP samples were analyzed through inductively coupled plasma mass spectrometry  
146 (ICP-MS; Elan 6100; Perkin Elmer<sup>TM</sup>, USA). A multi-element standard, prepared  
147 from stock (Merk) composed of 2 % HNO<sub>3</sub> solution, was used for calibration. An  
148 internal standard containing indium (10 ng mL<sup>-1</sup>) was used to correct instrumental  
149 drift. To minimize the isobaric interference, the nebulizer gas flow rate was adjusted  
150 to 0.7 - 0.9 L min<sup>-1</sup>. To reduce formation of doubly charged ions and oxides, Ba<sup>++</sup>/Ba

151 and CeO/Ce must be lower than the recommended values of 0.01 and 0.02,  
152 respectively. Accuracy and precision were assessed by replicate measurements (N=7)  
153 of the standard reference material NIST SRM 1648, following the total digestion  
154 process. The results showed that the recoveries for most elements fell within 90-110%  
155 and the precisions were less than 5 %. **Arsenic, a target element, exhibited a recovery**  
156 **of 106 % and a precision of 2 %.** For each run, a blank reagent and three filter  
157 membrane blanks were subjected to the same procedure as that for the aerosol  
158 samples. The method detection limits (MDLs) were 0.01 ng m<sup>-3</sup> for both As and Pb.

159 Another half of the filter sample was extracted with 20 mL Milli-Q water (18.2  
160 Ω) by using ultra-sonic apparatus for 1h. The extracted solution was subsequently  
161 analyzed for water-soluble ions, including Na<sup>+</sup>, NH<sub>4</sub><sup>+</sup>, K<sup>+</sup>, Mg<sup>2+</sup>, Ca<sup>2+</sup>, Cl<sup>-</sup>, NO<sub>3</sub><sup>-</sup>, and  
162 SO<sub>4</sub><sup>2-</sup>, by ion chromatography (Dionex ICS-90 for cations and ICS-1500 for anions)  
163 equipped with a conductivity detector (ASRS-ULTRA). A QA/QC program including  
164 calibration, recovery and precision test along with MDLs for all ions was conducted  
165 during the analyzed processes. A multi-ion solution (Merck) was used for calibration  
166 of IC instrument and seven-point calibration curves were made for each batch of  
167 samples. One laboratory blank was taken for each batch analysis and MDL was  
168 calculated as 3 times standard deviation of the values of 7 blanks. The average  
169 recoveries for all species were in the range of 91-105 %; the precisions for all species  
170 were less than 5 %.

171

### 172 ***2.3 Principal component analysis***

173 **Principal component analysis (PCA), as a technique which attempts to explain**  
174 **the statistical variance in a given dataset in terms of a minimum number of significant**  
175 **components, has been widely employed to identify potential sources for airborne**

176 particulate matters observed at a receptor site (Vina et al., 2006; Venter et al., 2017).  
177 To compute PCA model, the first step was to transform the chemical data into  
178 normalized form as:

$$179 \quad Z_{ij} = \frac{C_{ij} - \mu_j}{\sigma_j} \quad (1)$$

180 where  $Z_{ij}$  is the normalized value of the species  $j$  in  $i$  sample.  $C_{ij}$  is the concentration  
181 of species  $j$  in sample  $i$ ;  $\mu_j$  and  $\sigma_j$  are the mean concentration and standard deviation  
182 for species  $j$ . The PCA model was then expressed as:

$$183 \quad Z_{ij} = \sum_{k=1}^n g_{ik} h_{kj} \quad (2)$$

185  
186 where  $k=1, \dots, n$  represents the different sources, and  $g_{ik}$  and  $h_{kj}$  are the factor loading  
187 and factor score, respectively. Associated with each component is an eigenvalue; only  
188 principal components with eigenvalue greater than 1.0 were selected to identify  
189 aerosol sources. The software of SPSS (IBM statistics 19) was performed for PCA  
190 analysis.

191

## 192 **2.4 Backward trajectory analysis**

193 To identify potential sources of airborne arsenic at Mount Hehuan, five-day  
194 backward trajectories were computed by the Hybrid Single-Particle Lagrangian  
195 Integrated Trajectory (HYSPLIT) model developed by the USA NOAA Air Resources  
196 Laboratory (Draxler and Hess, 1998). The meteorological data for the trajectory  
197 model was the GDAS (Global Data Assimilation System), which were processed by  
198 the NCEP with a 6-h time resolution, about 190 km horizontal resolution, and 23  
199 vertical levels. In this work, five-day backward trajectories arriving at 3000 m a.s.l.  
200 were computed at 12:00 LT (local time) once every day with a time step of 6 hours.

201 Four additional trajectories were generated of which starting locations were changed  
202  $\pm 0.5^\circ$  from the actual sampling site to reduce the uncertainty of the trajectory analysis.  
203 During the sampling period, a total of 1865 backward trajectories were computed.  
204 According the originated regions of air parcels, we divided the trajectories into five  
205 groups, namely, Northern China (NC), Pacific Ocean (PO), South Sea (SS), Southeast  
206 Asia (SEA) and South Asia (SA).

207 Figure 1 shows the pathways of five different air clusters at Mount Hehuan. The  
208 frequency of SA was 33%, which was the predominant air clusters, followed by PO  
209 (24%), SS (18%), SEA (18%) and NC (7%). In the NC group, the air mass originated  
210 mainly from Northern China, where heavily polluted air is contaminated by industrial  
211 emissions, moving to the south areas slowly and then arrived at the receptor site. The  
212 NC air cluster was predominately found in March, August and September with a  
213 frequency of  $> 16\%$  (shown in Figure 2). In case of PO, the air parcel generally came  
214 from Western Pacific Ocean, spending much time in marine atmosphere before  
215 arriving at Taiwan. This air cluster was most predominately found from July to  
216 September with a frequency of  $> 48\%$ . High frequency ( $> 20\%$ ) of PO cluster was  
217 also surprisingly found in October and November. For SS air cluster, the air parcel  
218 was regularly from South Sea, crossing the marine areas or Luzon Islands, and then  
219 arrived at Mount Hehuan. This air group accounted for  $18\%$  with a high frequency in  
220 June, July and November. For SEA group, the air mass typically came from  
221 Indo-China Peninsula, occasionally passing across polluted Southern China, like  
222 Sichuan Basin and Pearl River Delta (PRD) region, before reaching Taiwan. The SEA  
223 air group was profoundly occurred from March to June with the frequency exceeding  
224  $30\%$ . Finally, the air parcel of the SA cluster was mainly from Middle East and  
225 Indian Subcontinent, passing over northern parts of Myanmar, Thailand, Laos and

226 Vietnam along with PRD region, and then descended to Mount Hehuan. The SA group  
227 was frequently found during the sampling periods, except for July to September. The  
228 air masses of NC, SEA and SA groups were associated with continental origins as  
229 they spent much time in Asia continent before arriving at Mount Hehuan. The  
230 continental air masses were mostly prevailed from mid-autumn to late spring (see in  
231 Figure 2). On the contrary, PO and SS air clusters were grouped into marine air  
232 parcels and were profoundly found from June to September. Nevertheless, the air  
233 parcels from NC, SEA and SA groups would be anticipated picking up polluted air  
234 and transporting to Mount Hehuan compared with PO and SS air clusters that spent  
235 much time in marine atmosphere.

236

### 237 *2.5 WRF-Chem model*

238 To simulate long-range BB plumes transported to Mount Hehuan, the WRF  
239 model coupled with chemistry module (WRF-Chem; Ver. 3.2.1) was employed.  
240 Previously, this model has been successfully simulated and identified the biomass  
241 burning transportation from SE and S Asia (Chi et al. 2010; Lin et al. 2009; 2014). In  
242 this study, a tracer module in WRF-Chem developed by Lin et al (2009) was  
243 employed to identify the transport. The tracers were assigned to the fire locations  
244 derived from MODIS satellite data over the study domain. They were placed at the  
245 first level above the surface at each fire location with a concentration of 1 unit per day.  
246 The dry and wet deposition functions are considered in the model. The meteorological  
247 initial and boundary conditions for WRF-Chem were acquired from NCEP-FNL  
248 Global Forecast System (GFS)  $0.5^\circ \times 0.5^\circ$  analysis data sets (35 vertical levels). The  
249 Mellor Yamada Janijc (MYJ) planetary boundary layer scheme was selected in this  
250 study. The horizontal resolution for our BB simulations was 27 km. To assure the

251 meteorological fields were well simulated, the four-dimensional data assimilation  
252 (FDDA) scheme was activated based on the NCEP-GFS analysis data.

253

## 254 ***2.6 MODIS fire spots***

255 The fire spots from BB activities were extracted by the Moderate Resolution  
256 Image Spectroradiometers (MODIS) on board NASA's polar-orbit Aqua and Terra  
257 satellites. MODIS fire detection algorithm employs infrared spectrum channels of 4  
258  $\mu\text{m}$  and 11  $\mu\text{m}$  (Kaufman et al., 1998). The 1-km Level-2 active fire products,  
259 abbreviating MOD14 and MYD14, provide the detection time, coordinates,  
260 confidence, bright temperature for each fire pixels (Giglio, 2013). Details of the fire  
261 detection algorithm was discussed by Giglio et al. (2003). In this work, MODIS  
262 Level- 2 fire spots observed within a domain ( $65^{\circ}\text{E}\sim 135^{\circ}\text{E}$  and  $5^{\circ}\text{N} \sim 40^{\circ}\text{N}$ ) from  
263 September 2011 to September 2012 were obtained. We used the datasets to analyze  
264 the monthly distributions of BB activities over the SE and S Asian continent.

265

## 266 **3. Results and discussion**

### 267 ***3.1 Overview of Airborne Particulate As***

268 A total of 302 daily TSP samples were collected at Mount Hehuan during the  
269 sampling period. Each TSP sample has been determined the concentrations of water-  
270 soluble ions and elements by IC and ICP-MS, respectively. Because the net mass of  
271 each collected aerosol sample was not measured, the abundance of each species  
272 relevant to TSP mass cannot not be obtained. Figure 3 displays the average  
273 concentrations of ionic species together with metallic elements in TSP samples. **All**  
274 **the concentrations are presented under prevailing conditions.** Without determination  
275 of carbon contents, sulfate was the most predominant species in airborne TSP samples



276 with a mean concentration of  $4.1 \mu\text{g m}^{-3}$ , followed by nitrate ( $2.0 \mu\text{g m}^{-3}$ ), ammonium  
277 ( $1.7 \mu\text{g m}^{-3}$ ) and chloride ( $0.23 \mu\text{g m}^{-3}$ ). Aluminum (Al), a typical geological material,  
278 exhibited a mean concentration of  $184 \text{ ng m}^{-3}$ , which was the predominant elements.  
279 In addition to K, Ca and Fe (up to  $100 \text{ ng m}^{-3}$ ) were also major metals, followed by  
280 Na, Mg, Cu, Ti, Zn and P ( $10$  to  $100 \text{ ng m}^{-3}$ ), and then followed by Pb, Mn, Ba and Sr  
281 ( $1$  to  $10 \text{ ng m}^{-3}$ ). The rest metals had concentrations of  $< 1 \text{ ng m}^{-3}$  over the free  
282 troposphere. As expected, high concentrations for all species were found for the  
283 continental air clusters, including NC, SEA and SA air groups (see in Table S1). In  
284 particular, the SA air parcel picked up heavily polluted air to the receptor site since  
285 the concentrations of secondary inorganic aerosols (SIA, including  $\text{SO}_4^{2-}$ ,  $\text{NO}_3^-$  and  
286  $\text{NH}_4^+$ ) and crustal materials (Al, Fe, Ca, Na, K, Mg and Sr) were significantly higher  
287 than those of other continental air clusters. Although the reason was not well  
288 understood, it might be attributed to the different emission sources the air passed and  
289 atmospheric processes during their long-range transport.

290 Arsenic, a target element in this study, exhibited a daily concentration from 0.02  
291 to  $5.9 \text{ ng m}^{-3}$  with a mean value of  $0.5 \pm 1.0 \text{ ng m}^{-3}$  (Figure S1). As expected, arsenic  
292 concentrations in the continental air groups, such as SA, NC and SEA, were much  
293 higher than those in the marine air categories (Figure 1 and Table S1). The As  
294 concentrations ( $\sim 0.1 \text{ ng m}^{-3}$ ) in PO and SS air groups were in agreement with that of  
295 Mauna Loa, Hawaii (Zieman et al., 1995), indicating that the low As value can be  
296 considered as a background value in the subtropical free troposphere (Zieman et al.,  
297 1995). A large standard deviation suggested that As concentration at this mountainous  
298 site had a large day-to-day variation. Some As peaks were found with enhancements  
299 of both CO and potassium ion ( $\text{K}^+$ ), especially between January and May, indicating  
300 BB origins.

301 Figure 4a shows monthly variations of 75th, 50th and 25th percentile values of  
302 arsenic concentrations observed at Mount Hehuan. As can be seen, the median  
303 concentration of arsenic increased from January ( $0.18 \text{ ng m}^{-3}$ ), maximizing in May  
304 ( $0.81 \text{ ng m}^{-3}$ ), and then decreased abruptly through June to December (from  $0.05 \text{ ng}$   
305  $\text{m}^{-3}$  in June to  $0.13 \text{ ng m}^{-3}$  in August). The seasonality of As was different from those  
306 of Al (a tracer of dust) and  $\text{K}^+$  (a marker of BB) as shown in Figures 4b and 4c, but  
307 was very similar to that of Pb (Figure 4d), suggesting As and Pb might be originated  
308 from the similar sources. The seasonal distributions of As at this mountainous site  
309 were associated with emission sources, regional circulations and local meteorological  
310 conditions. Marine air prevailed from July to November, except October, resulting in  
311 lower As concentrations over the subtropical free troposphere. On the contrary,  
312 continental air prevailed in the wintertime and springtime, picking up polluted air and  
313 transported to the receptor site; as a result, increase of As concentrations was expected.  
314 Besides, favorable locally meteorological conditions for dispersion of air pollution  
315 might be another reason for the lower As concentrations in the summertime (Lin et al.,  
316 2011; 2013).

317 The 95th percentile value for As concentration is better to understand the  
318 distributions of extremely high As events over the free troposphere. Higher 95th  
319 percentile values of arsenic were found between February ( $0.99 \text{ ng m}^{-3}$ ) and May  
320 ( $1.27 \text{ ng m}^{-3}$ ) compared to those of other seasons (from  $0.09 \text{ ng m}^{-3}$  in November to  
321  $0.60 \text{ ng m}^{-3}$  in September), reflecting more high-As plumes crossed over Mount  
322 Hehuan from late-winter to late-spring. Over the subtropical free troposphere, two  
323 distinct haze plumes were usually observed from late winter to spring: one is dust  
324 storm that originated from East-Asian and non-East Asian continents (Lin et al., 2001;  
325 Hsu et al., 2012); another one is BB plume which mainly comes from SE and S Asia

326 (Lin et al., 2009; 2010). As shown in Figures 4b and 4c, substantially elevated Al and  
327  $K^+$  concentrations were observed in the springtime, especially for 75th percentile  
328 values, suggesting that Mount Hehuan was influence by both dust and BB aerosols.  
329 Both specific plumes would impact the atmospheric compositions, of course,  
330 including airborne As in Pacific region.

331

### 332 ***3.2 Potential source for As in the BB seasons***

333 As mentioned earlier, high As concentrations were observed during the SE and S  
334 Asian BB seasons. In this section, we attempted to investigate the potential sources of  
335 high As concentrations at Mount Hehuan. Table 1 lists the PCA results of TSP  
336 observed at Mount Hehuan during the SE and S Asian BB seasons and non-BB  
337 seasons (from June to December). The results showed that there were three factors of  
338 TSP during the BB seasons. PC1 was associated with a mixed source of crustal  
339 materials (high loading of Al, Fe, Mg, Ca, Sr, Ti, Mn and Rb along with La, Ce and  
340 Nd), SIA (high loadings of  $SO_4^{2-}$ ,  $NO_3^-$  and  $NH_4^+$ ) and industrial emissions (high  
341 loadings of Ni, Mo, Tl, V and Se). In PC2, a high loading was found for  $K^+$  and a  
342 moderate loading for CO, indicating BB sources. Interestingly, moderate loadings  
343 were also found for As and Pb, suggesting both species might be from BB activities.  
344 The PC3 was regarded as sea salt aerosols since the high loadings were found for  $Na^+$   
345 and  $Cl^-$ . During the non-BB periods, three factors were also assessed. The PC1 was  
346 assigned as a source related to crustal materials with high loadings of Al, Fe, Mg, Ca,  
347 Sr, Ti, Mn, Rb, La, Ce and Nd. In terms of PC2, high loadings of Tl, As and Se were  
348 found, suggesting industrial emissions. In particular, highly positive loadings were  
349 found for As and Se, indicating that As at Mount Hehuan during the non-BB seasons  
350 was mainly attributed to coal-fired power plant which was very different from the

351 result during the periods from January to May. The PC3 exhibited high loadings of  
352  $\text{SO}_4^{2-}$ ,  $\text{NO}_3^-$  and  $\text{NH}_4^+$  together with  $\text{Na}^+$  and  $\text{Cl}^-$ , reflecting SIA and sea salt aerosols.

353 Figure 5 shows the scattered plots of As against  $\text{K}^+$ , Al and Pb in different  
354 arsenic concentration bins. We found that As correlated well with  $\text{K}^+$  ( $r = 0.78$ ,  $p < .05$   
355 for the 95th percentile value of As) when severely high As events occurred,  
356 suggesting BB origins. Oppositely, arsenic correlated poorly with Al ( $r$  ranged from  
357 0.05 to 0.42) in all As concentration bins, indicating that wind-erosion soil was not a  
358 major source for airborne As at the sampling site. However, significantly positive  
359 correlations were observed between As and Pb within 75th percentile As values,  
360 reflecting that airborne As and Pb were from the similar sources in the high arsenic  
361 events.

362 As discussed above, BB activities may be an important regionally source for  
363 high As concentrations over the subtropical free troposphere, especially during the SE  
364 and S Asian BB seasons; consequently, we tried to prove the hypothesis using  
365 backward trajectory analyses and MODIS fires observations together with  
366 WRF-Chem model simulated results. Figure S2 shows the seasonality of fire spots  
367 over SE and S Asia observed by MODIS from 2011 September to 2012 September. In  
368 SE Asia, the BB activities showed strong seasonal variations with a gradual increase  
369 from January to March, when it reached a peak. It then decreased substantially from  
370 late spring to a minimum in summer. In South Asia, the total annual counts of fire  
371 spots were approximately 20 % of that in SE Asia. Similar seasonality was found with  
372 intensive fire spots in the springtime and maximum in May. The fire spots then  
373 decreased during summer to mid-winter and minimized in July. However, the total  
374 fire spots (SE Asia plus S Asia) maximized in March. This might explain why  
375 particulate  $\text{K}^+$  and CO concentrations at Mount Hehuan were highest in March.

376 For convenience, prior to further analysis we arbitrarily chose a  $K^+$  concentration  
377 of  $109 \text{ ng m}^{-3}$  (the 75th percentile value of potassium ion) as a criterion value for  
378 identifying the suspected BB events. A second criterion (CO concentration up to 160  
379 ppb) was also added for selection of the BB plume. Ultimately, a total of forty-nine  
380 suspected BB TSP samples were identified during the entirely sampling period. Figure  
381 6 shows time series of daily concentrations of As,  $K^+$  and CO observed at Mount  
382 Hehuan from January to May, 2012 when intensive BB activities were occurred over  
383 SE and S Asia. The air clusters are also shown in this figure for helping to identify the  
384 air origins. As can be seen, several As spikes coincided with increasing CO and  $K^+$   
385 (e.g. Feb. 19, Mar. 30, Mar. 31, Apr. 3, May 5 and 7 etc.), implying BB origins.  
386 Backward trajectory showed that the air parcels for the high arsenic events originated  
387 mainly from S Asia (see in Figure S3a). A high arsenic plume passed over Mount  
388 Hehuan with As concentration increasing from  $1.2 \text{ ng m}^{-3}$  on 25 March to  $5.3 \text{ ng m}^{-3}$   
389 on 3 April though low As concentration was found on 2 April. Figure S4a illustrates  
390 the five-day backward trajectories starting at Mount Hehuan during this period. The  
391 result showed the air parcels mainly passed over northern India, Nepal, Bangladesh  
392 and Southeast China before arriving at Taiwan. Figure 7a plots the distributions of  
393 MODIS fires from March 25 to April 3, and WRF-Chem model result at an altitude of  
394 700 hPa on April 3 when the high daily As concentration ( $5.3 \text{ ng m}^{-3}$ ) was observed.  
395 As seen, extensive fire spots were observed over Indian Subcontinent from March 25  
396 to April 2. In this case, the tracers were assigned to the fire locations derived from  
397 MODIS satellite data over Indian Subcontinent ranging from  $5$  to  $38^\circ \text{N}$  and  $65$  to  $90$   
398  $^\circ \text{E}$  and they were placed at the surface level above the surface at each fire location  
399 with a concentration of a unit per day. The WRF-Chem model result showed that the  
400 significant BB plume originated over burned areas, transporting to east direction, and

401 passed over Mount Hehuan, resulting in increased concentrations not only for K<sup>+</sup> and  
402 CO, but also for arsenic. As shown in Figure 8a, during the BB events over the S  
403 Asian continent, arsenic correlated well with K<sup>+</sup> ( $r=0.73$ ,  $p < .05$ ). On the contrary,  
404 the correlation coefficient between As and K<sup>+</sup> in the non-BB events was 0.53 ( $p > .05$ ).  
405 This supported our argument, that is, airborne arsenic at Mount Hehuan was attributed  
406 to BB activities over S Asia.

407 Some BB plumes were observed at Mount Hehuan, but the As concentrations  
408 were not elevated. For example, a suspected BB plume was found from March 8 to 15  
409 since K<sup>+</sup> and CO concentrations increased concurrently. Based on backward trajectory  
410 analysis, the air parcels during this BB event were mainly from SE Asia, passing over  
411 southeast China, and then arrived at Mount Hehuan (Figure S4b). Because backward  
412 trajectories were mainly from Indo-China Peninsula, the tracers were then placed at  
413 the surface level above the surface at each fire location in Indo-China Peninsula  
414 ranging from 5 to 30 °N and 90 to 110 °E. The WRF-Chem model showed that the  
415 significant tracer concentration laid in northeast-southwest belt and covered Taiwan  
416 on March 15 (as shown in Figure 7b). Nonetheless, the As did not rise, but kept at the  
417 low levels of 0.2 ng m<sup>-3</sup>. Another similar case was also found in the end of February  
418 (Feb. 25 to 28). The backward trajectories also showed that the air masses were  
419 mainly from Indo-China Peninsula (see in Figure S3b). Unlike BB events over S Asia,  
420 arsenic correlated weakly with K<sup>+</sup> ( $r = 0.4$ ,  $p > .05$ , Figure 8b) in the BB events from  
421 SE Asia, as well as that in the maritime air groups (Figure8c). These findings  
422 suggested that some specific sources might release numerous arsenic into atmosphere  
423 during BB activities over S Asia, but not over Indo-China Peninsula.

424 Wind-erosion soil particles are one of important sources for airborne arsenic.  
425 According to the investigation by Nriagu (1989), arsenic derived from wind-erosion

426 dust was  $2.1 \text{ Gg yr}^{-1}$ , accounting 18% for natural As emissions. Figures S4a – S4c  
427 show the scattered plots of As against Al in all air groups during the S and SE Asian  
428 BB periods. Poor correlations were found between As and Al in the various air groups,  
429 except for the SS air category ( $r = 0.88, p < .05$ ), indicating that wind-erosion soil was  
430 not a major source for As over the free troposphere. Interestingly, a good correlation  
431 of As and Al was found in the SS air group. The marine air parcels, which spent a  
432 long time in the clean marine atmosphere, are subjected to dilution which can affect  
433 the air pollution (Lin et al., 2011), probably resulting in similar behaviors of As and  
434 Al.

435 Recently, numerous studies pointed out S Asia, especially in west Bengal of  
436 India and Bangladesh, are extremely As-contaminated areas (Burgess et al., 2010;  
437 Neumann et al., 2010; Roberts et al., 2010;). In these regions, highly As-contaminated  
438 ground water, typically caused by geological process, is not only used for drinking  
439 water, but is also used for irrigation of crops. Accumulation of arsenic has been found  
440 in rice roots and rice plants along with crop soils (Norra et al., 2005). After burning,  
441 the As might be released from these crops into atmosphere, and transported easterly to  
442 Pacific regions with BB plumes. On the other hand, uses of pesticide as an insecticide  
443 for cotton, paddy and wheat in India and Bangladesh might be another reason for As  
444 contamination in crops (Aktar et al., 2009). **Lead arsenate (LA,  $[\text{Pb}_5\text{OH}(\text{AsO}_4)_3$ ];**  
445 **As/Pb~0.22) was the most extensively used as the arsenical insecticides in the world.**  
446 **It was used as an insecticide for gypsy moths invading hardwood forests in 1892. LA**  
447 **can be adhered to the surfaces of plants. Although LA was officially banned as**  
448 **insecticide in 1990's in many developed countries, but has not been banned in India**  
449 **nowadays.** Figures 9a and 9b show the scattered plots of As against Pb in TSP  
450 samples for various air groups during the S and SE Asian BB season. The higher As

451 concentrations were generally found in the SA air category. In case of SA air group,  
452 the average As concentration in the BB events were  $1.6 \pm 1.4 \text{ ng m}^{-3}$ , exceeding that  
453 ( $0.6 \pm 0.7 \text{ ng m}^{-3}$ ) in non-BB events by a factor of 2.7 ( $p < .05$ ), suggesting a special  
454 arsenic emission source over S Asian continent during the BB season. In some cases,  
455 low As concentrations were also found when the BB plumes transported from S Asia.  
456 The reason has not been clearly understood, but might be explained by a mixed source  
457 of the BB plume with other emissions during the air transportation. In terms of SEA  
458 group, no substantial discrepancy of As concentrations was found during BB and  
459 non-BB periods, indicating that BB over Indo-China Peninsula was unable to enhance  
460 As concentrations over the subtropical free troposphere.

461 During the S and SE Asian BB period, good correlations between As and Pb  
462 (ranging from 0.84 for SA-BB to 0.96 for NC, see in Figure 9) were found in various  
463 air groups; hence, a ratio of As/Pb might be given us an insight to trace the  
464 specifically regional arsenic emissions in SA air group when BB activity occurred.  
465 During the SA-BB plumes, the average As/Pb ratio was 0.18 (see in Figure 9a), which  
466 was much higher than the average value (0.11) of non-BB (SA-non-BB) events along  
467 with those (ranging from 0.08 to 0.1) of other air categories (see in Figures 9b and 9c),  
468 implying a special source for As during the BB events over S Asia. Some data sets of  
469 SA-BB groups showed low As/Pb ratios, probably reflecting mixed air of BB plumes  
470 and other emission sources transported to the subtropical free troposphere.

471 Wind-erosion soil particles and metal smelting (lead smelting) along with coal  
472 combustion industries are major natural and anthropogenic sources of airborne As,  
473 respectively. In Northern India, As/Pb ratio in natural soil, paved road and unpaved  
474 road dust varied from 0.02 to 0.13 while low As/Pb ratios were found in lead smelting  
475 (0.002), coal combustion in stoves (0.0016) and coal fire power plants (0.0026) (Patil



476 et al., 2013). Our As/Pb ratios in the SA-BB events were much higher, suggesting that  
477 wind-erosion dust, lead smelting and coal combustion seemed not to be major sources.  
478 In particular, the As/Pb ratio was normally higher than 0.20 when severely high As  
479 concentrations were observed. This ratio was in line with that of LA (~0.22),  
480 suggesting that burning crops contaminated by LA in S Asia could be a crucial  
481 candidate for extremely high As concentrations at Mount Hehuan during the BB  
482 periods.

483

### 484 **3.1 Impact of Biomass Burning**

485       The differences of As concentrations between the BB and non-BB days could be  
486 roughly considered as the net influence of BB activities on the airborne As  
487 concentrations over the subtropical free troposphere (Lin et al., 2010; 2013). Table 2  
488 lists the differences of As, Pb, K<sup>+</sup> and CO concentrations of BB and non-BB samples  
489 in SA and SEA air groups in the S and SE Asian BB seasons. For SA air cluster, all  
490 species increased apparently in the BB events. On average, the As concentrations in  
491 the BB and non-BB events were 1.6 and 0.6 ng m<sup>-3</sup>, respectively. The difference (1.0  
492 ng m<sup>-3</sup>) accounted 63 % for the average As concentration on the BB days. This  
493 indicated that S Asian BB activities played an important source for high As  
494 concentrations. On the contrary, the differences of concentrations in K<sup>+</sup> and CO were  
495 observed in the BB and non-BB events for SEA air clusters, but not found for As and  
496 Pb. Again, this suggested that BB activities from SE Asia would not release enormous  
497 arsenic into atmosphere and transport to the subtropical free troposphere by westerly  
498 belt.

499       From Table 2, we identified  $\Delta K^+$ ,  $\Delta CO$  and  $\Delta As$  as the differences of  
500 concentrations in K<sup>+</sup>, As and CO between BB and non-BB days in S and SEA air

501 clusters during the BB seasons. Here, we also converted the units of daily  $K^+$  and As  
502 concentrations from  $ng\ m^{-3}$  to ppb based on the ambient temperature and molecular  
503 weight of  $K^+$  and As; then, we can obtain the ratios of  $\Delta K^+/\Delta CO$  and  $\Delta As/\Delta CO$   
504 without units. The parameters are useful to estimate the  $K^+$  or As emissions from BB  
505 activities over S and SE Asia. As listed in Table 2, the BB air masses emitted from the  
506 S and SE Asian continents contained  $\Delta K^+/\Delta CO$  ratios of 0.0043 and 0.0018,  
507 respectively. Each value was in the same order of magnitude of that estimated by Tang  
508 et al. (2003) who claimed the BB events emitted from SE Asia had a  $\Delta K^+/\Delta CO$  ratio  
509 of 0.0038. Besides, a ratio of  $\Delta As/\Delta CO$  in the S Asian BB events was estimated to be  
510 0.00001, which was one order of magnitude higher than that ( $\Delta As/\Delta CO \sim 0.000001$ ) of  
511 SE Asian BB events, indicating that much more As released into atmosphere from the  
512 S Asian continent. According to the emission inventory, the annual CO emission rate  
513 from biomass burning over S Asia was nearly  $17\ Gg\ yr^{-1}$  (Stress et al., 2003), we then  
514 roughly estimated that approximately  $0.17\ tons\ yr^{-1}$  of arsenic was released into  
515 atmosphere due to S Asian BB activities, resulting in enhancements of As  
516 concentrations over the subtropical free troposphere.

517

#### 518 **4. Conclusion**

519 Daily TSP samples were collected at Mount Hehuan from September 2011 to  
520 September 2012, in order to investigate the behaviors of long-range transported  
521 particulate matters and their impact on atmospheric chemistry over the subtropical  
522 free troposphere. Arsenic, a target metal in TSP samples, were determined by ICP-MS.  
523 The results showed the daily As concentrations varied from 0.02 to  $5.9\ ng\ m^{-3}$  with a  
524 mean value of  $0.5 \pm 1.0\ ng\ m^{-3}$ . Some high As concentrations coincided with  
525 concurrent enhancements of  $K^+$  and CO. PCA results indicated that high As

526 concentrations were contributed by BB emissions during the S and SE Asian BB  
527 seasons. Backward trajectory and WRF-Chem model results suggested that the high  
528 As plumes originated mainly from S Asia. The ratio of As/Pb ( $> 0.2$ ) in high As  
529 events elucidated burning crops contaminated by lead arsenate might be an important  
530 source of high As concentrations at Mount Hehuan. Furthermore, biomass burning  
531 over S Asia produced an As/CO ratio of 0.00001 and released approximately 0.17 tons  
532 of As into atmosphere every year, causing increase in As concentrations over the  
533 subtropical free troposphere.

534 Asian continent is well known a big source of airborne As in North Pacific  
535 region. Previously, high As concentrations over free troposphere in Northern Pacific  
536 region have been considered as contributions of industrial emissions (Perry et al.,  
537 1990; Wai et al., 2016). From our study, we proposed a new concept for a potential  
538 source of high As over the subtropical free troposphere, that is, BB activities over S  
539 Asia might be an important source of airborne arsenic. In this study, arsenic emissions  
540 from S Asian BB activities was estimated to be 0.17 ton yr<sup>-1</sup>. Compared to the  
541 globally anthropogenic arsenic emissions ( $\sim 18.8$  Gg yr<sup>-1</sup>, Nriagu and Pacyan, 1988),  
542 arsenic released from the S Asian BB activities seemed to be neglected. Indeed, As  
543 concentrations at the receptor site did increase significantly when the BB plumes  
544 transported from S Asia to Mount Hehuan. Consequently, we concluded that BB  
545 activities over S Asia could certainly impact arsenic cycles on a regional scale that has  
546 never been considered in previous studies.

547

#### 548 **Acknowledgements**

549 This study was financially supported by the Natural Scientific Foundation of  
550 China (No. 91643109), the National Key Research and Development Program of

551 China (No. 2017YFC0210101), and the Ministry of Science and Technology of R.O.C.  
552 (No. MOST 104-2111-M-001-009-MY2).

553

554 **Reference**

555 Aktar, M. W., Sengupta, D., and Chowdhury, A.: Impact of pesticides use in  
556 agriculture: their benefits and hazards. *Interdiscip. Toxicol.*, 2, 1-12,  
557 doi:10.2478/v10102-009-0001-7, 2009.

558 Bissen, M., and Frimmel, F.H.: A review. Part I: occurrence, toxicity, speciation,  
559 mobility. *Acta Hydroch. Hydrob.*, 31, 9-18, doi:10.1002/ahch.200390025, 2003.

560 Brimblecombe, P.: Atmospheric arsenic. *Nature*, 280, 104-105, doi:10.1038/280104a0,  
561 1979.

562 Burgess, W. G., Hoque, M. A., Michael, H. A., Voss, C. I., Breit, G. N., and Ahmed, K.  
563 M.: Vulnerability of deep groundwater in the Bengal Aquifer System to  
564 contamination by arsenic. *Nat. Geosci.*, 3, 83-87, doi:10.1038/NEGO750, 2010.

565 Chang, D., and Song, Y.: Estimates of biomass burning emissions in tropical Asia  
566 based on satellite-derived data. *Atmos. Chem. Phys.*, 10, 2335-2351, doi:  
567 10.5194/acp-10-2335-2010, 2010.

568 Chi, K. H., Lin, C.-Y., Ou-Yang, C.-F., Wang, J.-L., Lin, N.-H., Sheu, G.-R., and Lee,  
569 C.-T.: PCDD/F measurement at a high-altitude station in central Taiwan:  
570 evaluation of long-range transport of PCCD/Fs during the Southeast Asia biomass  
571 burning event. *Environ. Sci. Technol.*, 44, 2954-2960, doi:10.1021/es1000984.

572 Crutzen, P. J., and Andreae, M. O.: Biomass burning in the Tropics-impact on  
573 atmospheric chemistry and biogeochemical cycles. *Science*, 250, 1667-1678, doi:  
574 10.1126/science.250.4988.1669, 1990.

575 Draxler, R. R., and Hess, G. D.: An overview of the HYSPLIT\_4 modeling system for

576 trajectories, dispersion and deposition. *Aust. Meteor. Mag.*, 47, 295-308, 1998.

577 Giglio, L., Descloitres, J., Justice, C. O., Kaufman, Y. J., 2003. An enhanced contextual  
578 fire detection algorithm for MODIS. *Remote Sens. Environ.*, 87, 273-282,  
579 doi:10.1016/S0034-4257(03)00184-6.

580 Hsu, S.-C., Hus, C.-A., Lin, C.-Y., Chen, W.-N., Mahowald, N. M., Liu, S.-C., Chou,  
581 C. C. K., Liang, M.-C., Tsai, C.-J., Lin, F.-J., Chen, J.-P., and Huang, Y.-T.: Dust  
582 transport from non-East Asian sources to the North Pacific. *Geophys. Res. Lett.*,  
583 39, L12804, doi:10.1029/2012GL150962, 2012.

584 Huang, K., Zhuang, G., Lin, Y., Fu, J. S., Wang, Q., Liu, T., Zhang, R., Jiang, Y., Deng,  
585 C., Fu, Q., Hsu, N. C., and Cao, B.: Typical types and formation mechanisms of  
586 haze in an Eastern Asia megacity, Shanghai. *Atmos. Chem. Phys.*, 12, 105-124,  
587 10.5194/acp-12-105-2012, 2012.

588 Kaufman, Y. J., Justice, C. O., Flynn, L. P., Kendall, J. P., Prins, E. M., Giglio, L.,  
589 Ward, D. E., Menzel, W. P., Setzer, A. W., Potential global fire monitoring from  
590 EOS-MODIS. *J. Geophys. Res.: Atmos.*, 32215-32238, doi: 10.1029/98JD01644,  
591 1998.

592 Kondo, Y., Morino, Y., Takegawa, N., Koike, M., Kita, K., Miyazaki, Y., Sachse, G.  
593 W., Vay, S. A., Avery, M. A., Flocke, F., Weinheimer, A. J., Eisele, F. L., Eondlo,  
594 M. A., Weber, R. J., Singh, H. B., Chen, G., Crafword, J., Blake, D. R., Fuelberg,  
595 H. E., Clarke, A. D., Talbot, R. W., Sandholm, S. T., Browell, E. V., Streets, D. G.,  
596 and Liely, B.: Impacts of biomass burning in Southeast Asia on ozone and  
597 reactive nitrogen over the western Pacific in spring. *J. Geophys. Res. Atmos.*, 109,  
598 D15, doi:10.1029/2003JD004203, 2004.

599 Lin, C.-Y., Hsu, H.-m., Lee, Y. H., Kuo, C. H., Sheng, Y.-F., and Chu, D. A.: A new  
600 transport mechanism of biomass burning from Indochina as identified by

601 modeling studies. *Atmos. Chem. Phys.*, 9, 7901-7911,  
602 doi:10.5194/acp-9-7901-2009, 2009

603 Lin, C.-Y., Zhao, C., Liu, X., Lin, N.-H., and Chen, W.-N.: Modelling of long-range  
604 transported of Southeast Asia biomass-burning aerosols to Taiwan an their  
605 radiative forcings over East Asia. *Tellus B*, 66, 1, doi:10.3402/tellusb.v66.23733,  
606 2014.

607 Lin, T.-H.: Long-range transport of yellow sand to Taiwan in spring 2000: observed  
608 evidence and simulation. *Atmos. Environ.*, 35, 5873-5882,  
609 doi:10.1016/S1352-2310(01)00392-2, 2001.

610 Lin, Y. C., Lin, C. Y., and Hsu, W. T.: Observations of carbon monoxide mixing ratios  
611 at a mountain site in central Taiwan during the Asian biomass burning season.  
612 *Atmos. Res.*, 95, 270-278, doi:10.1016/j.atmosres.2009.10.006, 2010.

613 Lin, Y. C., Lin, C. Y., Lin, P. H., Engling, G., Lan, Y.-Y., Kuo, T.-H., Hsu, W. T., and  
614 Ting, C.-J.: Observations of ozone and carbon monoxide at Mei-Feng mountain  
615 site (2269 m a.s.l.) in central Taiwan: seasonal variations and influence of Asian  
616 continental outflow. *Sci. Total Environ.*, 15, 3033-3042,  
617 doi:10.1016/j.scitotenv.2011.04.023, 2011.

618 Lin, Y. C., Lin, C. Y., Lin, P. H., Engling, G., Lin, Y. C., Lan, Y. Y., Chang, C. W. J.,  
619 Kuo, T. H., Hsu, W. T., and Ting, C. C.: Influence of Southeast Asian biomass  
620 burning on ozone and carbon monoxide over subtropical Taiwan. *Atmos.*  
621 *Environ.*, 64, 358-365, doi:10.1016/j.atmosenv.2012.09.050, 2013.

622 Lin, Y.-C.; Huh, C.-A.; Hsu, S.-C.; Lin, C.-Y.; Liang, M.-C., and Lin, P.-H.:  
623 Stratospheric influence on the concentration and seasonal cycle of lower  
624 tropospheric ozone: observation at Mount Hehuan, Taiwan. *J. Geophys. Res.*  
625 *Atmos.*, 119, 3527-3536, doi:10.1002/2013JD020736, 2014.

626 Mandal, B. K., and Suzuki, K. T.: Arsenic round the world: a review. *Talanta*, 58,  
627 201-235; doi:10.1016/S00399140(02)00268-0, 2002.

628 Neumann, R. B., Ashfague, N., Badruzzaman, A. B. M., Ali, M. A., Shoemaker, J. K.,  
629 and Harvey, C. F.: Anthropogenic influences on groundwater arsenic  
630 concentrations in Bangladesh. *Nat. Geosci.*, 3, 46-52, doi:10.1038/nego685, 2010.

631 Niyobuhungiro, R.V., and Blottnitz, H.v.: Investigation of arsenic airborne in  
632 particulate matter around caterers' wood fires in Cape Town region. *Aerosol Air*  
633 *Qual. Res.*, 13, 219-224, doi:10.4029/aaqr.2012,06.0148, 2013.

634 Norra, S., Berner, E. A., Agarwala, P., Wagner, E., Chandrasekharam, D., and Stüben,  
635 D.: Impact of irrigation with As rich groundwater on soil and crops: a  
636 geochemical study in West Bengal Delta Plain, India. *Appl. Geochem.*, 20,  
637 1890-1906, doi:10.1016/j.apgeochem.2005.04.019, 2005.

638 Nriagu, J. O., and Pacyna, J. M.: Quantitative assessment of worldwide contamination  
639 of air, water and soils by trace metals. *Nature*, 333, 134-139,  
640 doi:10.1038/333134a0, 1988.

641 Nriagu, J. O.: A global assessment of natural sources of atmospheric trace metals.  
642 *Nature*, 338, 47-49, doi:10.1038/338047a0, 1989.

643 Patil, R. S., Kumar, R., Menon, R., Shah, M. K., and Sethi, V.: Development of  
644 particulate matter speciation profiles for major sources in six cities in India.  
645 *Atmos. Res.*, 132-133, doi:10.1016/j.atmosres.2013.04.012, 2013.

646 Perry, K. D., Chahill, T. A., Schnell, R. C., and Harris, J. M.: Long-range transport of  
647 anthropogenic aerosols to the National Oceanic and Atmospheric Administration  
648 baseline station at Mauna Loa Observatory, Hawaii. *J. Geophys. Res. Atmos.*, 104,  
649 18521-18533, doi:10.1029/1998JD100083, 1999.

650 Pochanart, P., Akimoto, H., Kajii, Y., and Sukasem, P.: Carbon monoxide,

651 regional-scale, and biomass burning in tropical continental Southeast Asia:  
652 Observations in rural Thailand. *J. Geophys. Res. Atmos.*, 108, D17,  
653 doi:10.1029/2002JD003360, 2003.

654 Ramanathan, V., Crutzen, R. J., Kiehl, J. T., and Rosenfeld, D.: Aerosols, climate and  
655 the hydrological cycle. *Science*, 294, 2119-2124, doi:10.1126/science.1064034,  
656 2001.

657 Roberts, L. C., Hug, S. J., Dittmar, J., Voegelin, A., Kretzschmar, R., Wehrli, B.,  
658 Cirpka, O. A., Saha, G. C., Ali, M. A., and Badruzzaman, A. B. M.: Arsenic  
659 release from paddy soils during monsoon flooding. *Nat. Geosci.* 3, 53-59,  
660 doi:10.1038/ngeo723, 2010.

661 Stress, D. G., Yarber, K. F., Woo, J.-H., and Carmichael, G. R.: Biomass burning in  
662 Asia: Annual and seasonal estimates and atmospheric emissions. *Global  
663 Biogeochem. Cycles* 170, 1099, doi:10.1029/2003GB002040, 2003.

664 Tang, Y., Carmichael, R. G., Woo, J.-H., Thongboonchoo, N., Kurata, G., Uno, I.,  
665 Streets, D. G., Blake, D. R., Weber, R. J., Talbot, R. W., Kondo, Y., Singh, H. B.,  
666 and Wang, T.: Influence of biomass burning during the Transport and Chemical  
667 Evolution Over the Pacific (TRACE-P) experiment identified by the regional  
668 chemical transport model. *J. Geophys. Res. Atmos.*, 108, D21,  
669 doi:10.1029/2002JD003110, 2003

670 Taylor, S. R.: Abundance of chemical elements in the continental crust: a new table.  
671 *Geochim. Cosmochim. Acta*, 28, 1273-1285, doi:10.1016/0016-7037(64)90129-2,  
672 1964.

673 Val Martin, M., Logan, J. A., Kahn, R., Leung, F., Nelson, D. L., Diner, D.: Smoke  
674 injection heights from fires in North America: analysis of 5 years of satellite  
675 observations. *Atmos. Chem. Phys.*, 10, 1491-1510,



676 [doi:10.5194/acp-10-1491-2010](https://doi.org/10.5194/acp-10-1491-2010).

677 [ven der Werf, G. R., Randerson, J. T., Giglio, L., van Leeuwen, T. T., Chen, Y., Rogers,](#)  
678 [B. M., Mu, M., van Marie, M. J. E., Morton, D., Collatz, G. J., Yokelson, R. J.,](#)  
679 [Kasibhatla, P. S., 2017. Global fire emissions estimates during 1997-2016. Earth](#)  
680 [Syst. Sci. Data, 9, 697-720, doi:10.5194/essd-9-697-2017.](#)

681 [Venter, A. D., van Zyl, P. G., Beukes, J. P., Josipovic, M., Hendriks, J., Vakkari, V.,](#)  
682 [Laakso, L., Atmospheric trace metals measured at a regional background site,](#)  
683 [\(Welgegund\) in South Africa. Atmos. Chem. Phys., 17, 4251-4263,](#)  
684 [doi:10.5194/acp-17-4251-2017, 2017.](#)

685 [Viana, M., Querol, X., Alastuey, A., Gil, J. J., Menéndez, M., Identification of PM](#)  
686 [sources by principal component analysis \(PCA\) coupled with wind direction data.](#)  
687 [Chemosphere, 65, 2411-2418, doi:10.1016/j.chemosphere.2006.04.060, 2006.](#)

688 [Wai, K.-H., Wu, S., Li, X., Jaffe, D. J., and Perry, K.D.: Global atmospheric transport](#)  
689 [and source-receptor relationships for arsenic. Environ. Sci. Technol., 50,](#)  
690 [3714-3720, doi:10.1021/acs.est.5b05549, 2016.](#)

691 [Walsh, P. R., Duce, R. A., and Fasching, J. L.: Considerations of the enrichment,](#)  
692 [sources and flux of arsenic in the troposphere. J. Geophys. Res. Oceans, 84,](#)  
693 [1719-1726, doi:10.1029/JC084iC04p01719, 1979.](#)

694 [Weiss-Penizas, P, Jaffe, D., Swartzendruber, P., Hafner, W., Chand, D., and Prestbo, E.:](#)  
695 [Quantifying Asian and biomass burning sources of mercury using the Hg/CO](#)  
696 [ratio in pollution plumes observed at the Mount Bachelor observatory. Atmos.](#)  
697 [Environ., 41, 4366-4379, doi:10.1016/j.atmosenv.2007.07.058, 2007.](#)

698 [Zieman, J. J., Holmes, J. L., Connor, D., Jensen, C. R., Zoller, W. H.: Atmospheric](#)  
699 [aerosol trace element chemistry at Mauna Loa Observatory: 1. 1979-1985. J.](#)  
700 [Geophys. Res. Atmos., 100, 25979-25994, doi:10.1029/93JD03316, 1995.](#)

## Table Captions

Table 1 Summarizes of principal component analysis for aerosol species along with carbon monoxide observed at Mount Hehuan. Factor loadings lower than  $\pm 0.4$  are not given. Factor loadings lower than  $\pm 0.7$  are marked in bold.

Table 2 The max, min, mean, standard deviation values of As, Pb, K<sup>+</sup> and CO of on the BB and Non-BB days in RA and SA air clusters **during the SE and S Asian BB periods (from January to May).**

## Figure Captions

Figure 1 Clusters of backward trajectory at Mount Hehuan from September 2011 to September 2012.

Figure 2 Monthly distributions of the fractions for various air clusters at Mount Hehuan during the sampling period.

Figure 3 Average concentrations of chemical compositions in TSP samples collected at Mount Hehuan site from September 2011 to September 2012.

Figure 4 Monthly distributions of 5th, 25th, 50th, 75th and 95th percentile values of As concentrations observed at Mount Hehuan from 2011 September to 2012 September.

Figure 5 Scattered plots of As against (a) K<sup>+</sup>, (b) Al and (c) Pb in different As concentration bins observed at Mount Hehuan

Figure 6 **Time series of daily airborne particulate As, Pb and K<sup>+</sup> along with CO concentrations and clusters of trajectory observed from January to May in 2012. In the bottom panel. the green and grey crosses denote BB and non-BB samples identified in the text.**

Figure 7 MODIS fires on ground surface and WRF-Chem modeled results of BB plumes at the altitude of 700 hPa on (a) April 3 and (b) March 15. The blue arrows and lines denote the wind direction and wind speed, respectively. The grey shadows represent tracer concentrations.

Figure 8 Scattered plots of As against  $K^+$  observed at Mount Hehuan in (a) SA, (b) SEA and (c) other air groups during the S Asian biomass burning seasons.

Figure 9 Scattered plots of As against Pb observed at Mount Hehuan in (a) SA, (b) SEA and (c) other air groups during the S Asian biomass burning seasons.

Table 1 Summarizes of principal component analysis for aerosol species along with carbon monoxide observed at Mount Hehuan. Factor loadings lower than  $\pm 0.4$  are not given. Factor loadings lower than  $\pm 0.7$  are marked in bold.

| Components                    | BB periods (from January to May) |             |             | Non-BB periods (from June to December) |             |                   |
|-------------------------------|----------------------------------|-------------|-------------|----------------------------------------|-------------|-------------------|
|                               | PC1                              | PC2         | PC3         | PC1                                    | PC2         | PC3               |
| Al                            | <b>0.96</b>                      | -           | -           | <b>0.98</b>                            | -           | -                 |
| Fe                            | <b>0.96</b>                      | -           | -           | <b>0.97</b>                            | -           | -                 |
| Mg                            | <b>0.90</b>                      | -           | -           | <b>0.73</b>                            | -           | -                 |
| Ca                            | <b>0.87</b>                      | -           | -           | <b>0.71</b>                            | -           | -                 |
| Sr                            | <b>0.87</b>                      | -           | -           | -                                      | -           | -                 |
| Ba                            | <b>0.94</b>                      | -           | -           | <b>0.85</b>                            | -           | -                 |
| Ti                            | <b>0.97</b>                      | -           | -           | <b>0.97</b>                            | -           | -                 |
| Mn                            | <b>0.97</b>                      | -           | -           | <b>0.81</b>                            | 0.48        | -                 |
| Ni                            | <b>0.96</b>                      | -           | -           | -                                      | -           | -                 |
| Zn                            | <b>0.85</b>                      | -           | -           | -                                      | -           | -                 |
| Mo                            | <b>0.84</b>                      | -           | -           | -                                      | 0.40        | -                 |
| Sb                            | <b>0.76</b>                      | 0.55        | -           | -                                      | <b>0.89</b> | -                 |
| Tl                            | <b>0.85</b>                      | 0.43        | -           | -                                      | <b>0.87</b> | -                 |
| Pb                            | -                                | 0.51        | -           | -                                      | 0.45        | -                 |
| V                             | <b>0.98</b>                      | -           | -           | <b>0.75</b>                            | 0.47        | -                 |
| As                            | -                                | 0.67        | -0.44       | -                                      | <b>0.80</b> | -                 |
| Se                            | <b>0.87</b>                      | 0.43        | -           | -                                      | <b>0.85</b> | -                 |
| Rb                            | <b>0.98</b>                      | -           | -           | <b>0.91</b>                            | -           | -                 |
| La                            | <b>0.94</b>                      | -           | -           | <b>0.94</b>                            | -           | -                 |
| Ce                            | <b>0.95</b>                      | -           | -           | <b>0.95</b>                            | -           | -                 |
| Nd                            | <b>0.96</b>                      | -           | -           | <b>0.97</b>                            | -           | -                 |
| Na <sup>+</sup>               | -                                | -           | <b>0.80</b> | -                                      | -           | <b>0.87</b>       |
| NH <sub>4</sub> <sup>+</sup>  | <b>0.80</b>                      | 0.49        | -           | -                                      | -           | <b>0.78</b>       |
| K <sup>+</sup>                | -                                | <b>0.71</b> | 0.47        | -                                      | -           | <b>0.68</b>       |
| Cl <sup>-</sup>               | -                                | -           | <b>0.66</b> | -                                      | -           | <b>0.70</b>       |
| SO <sub>4</sub> <sup>2-</sup> | <b>0.86</b>                      | 0.47        | -           | -                                      | 0.53        | <b>0.73</b>       |
| NO <sub>3</sub> <sup>-</sup>  | <b>0.75</b>                      | -           | 0.55        | -                                      | -           | <b>0.79</b>       |
| CO                            | 0.43                             | 0.50        | -           | -                                      | 0.59        | -                 |
| Potential sources             | Dust + SIA +<br>Industry         | BB          | Sea salt    | Dust                                   | Industry    | SIA + Sea<br>salt |
| Explain variance              | 49.3                             | 25.9        | 16.1        | 34.9                                   | 17.4        | 16.2              |

Table 2 The max, min, mean, standard deviation values of As, Pb, K<sup>+</sup> and CO of on the BB and Non-BB days in RA and SA air clusters during the SE and S Asian BB periods (from January to May).

| Categories                    | As<br>(ng m <sup>-3</sup> ) | Pb<br>(ng m <sup>-3</sup> ) | K <sup>+</sup><br>(ng m <sup>-3</sup> ) | CO<br>(ppb) |
|-------------------------------|-----------------------------|-----------------------------|-----------------------------------------|-------------|
| <b><i>SA air cluster</i></b>  |                             |                             |                                         |             |
| <b><u>Non-BB</u></b>          |                             |                             |                                         |             |
| Max                           | 3.5                         | 16.9                        | 831                                     | 432         |
| Min                           | 0.05                        | 0.6                         | 15                                      | 102         |
| Mean                          | 0.6                         | 4.5                         | 207                                     | 188         |
| Std.                          | 0.7                         | 3.8                         | 173                                     | 86          |
| <b><u>BB</u></b>              |                             |                             |                                         |             |
| Max                           | 5.3                         | 28.5                        | 1617                                    | 316         |
| Min                           | 0.13                        | 1.6                         | 71                                      | 156         |
| Mean                          | 1.6                         | 10.2                        | 404                                     | 217         |
| Std.                          | 1.4                         | 7.3                         | 336                                     | 42          |
| Differences <sup>1</sup>      | 1.0                         | 5.7                         | 197                                     | 29          |
| <b><i>SEA air cluster</i></b> |                             |                             |                                         |             |
| <b><u>Non-BB</u></b>          |                             |                             |                                         |             |
| Max                           | 1.6                         | 10.0                        | 452                                     | 282         |
| Min                           | 0.02                        | 0.3                         | 4                                       | 95          |
| Mean                          | 0.4                         | 2.9                         | 151                                     | 148         |
| Std.                          | 0.4                         | 2.5                         | 141                                     | 45          |
| <b><u>BB</u></b>              |                             |                             |                                         |             |
| Max                           | 2.3                         | 11.0                        | 609                                     | 259         |
| Min                           | 0.08                        | 1.1                         | 139                                     | 170         |
| Mean                          | 0.6                         | 4.2                         | 328                                     | 212         |
| Std.                          | 0.7                         | 3.2                         | 178                                     | 39          |
| Differences                   | 0.2                         | 1.3                         | 177                                     | 64          |

1. Difference for each species are calculated by the mean values in BB and non-BB events.

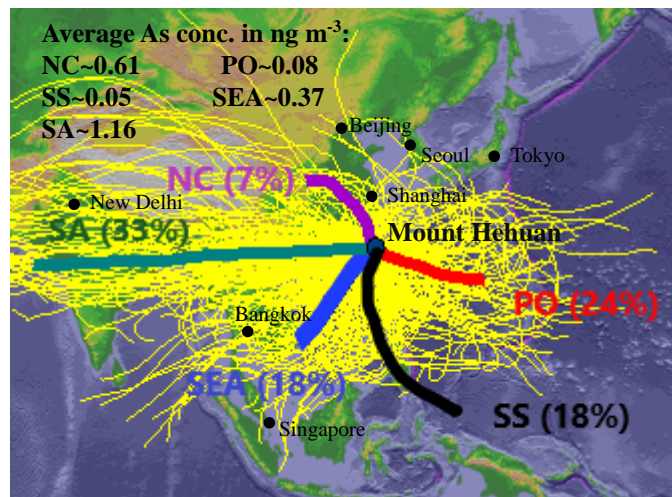

Figure 1

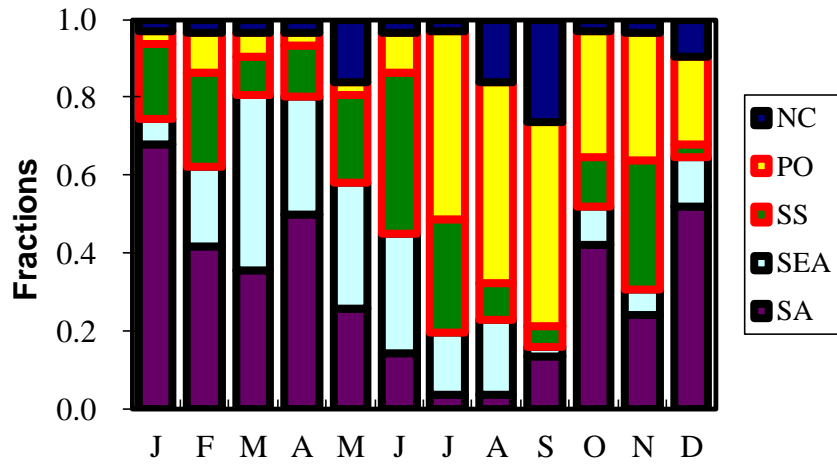

Figure 2

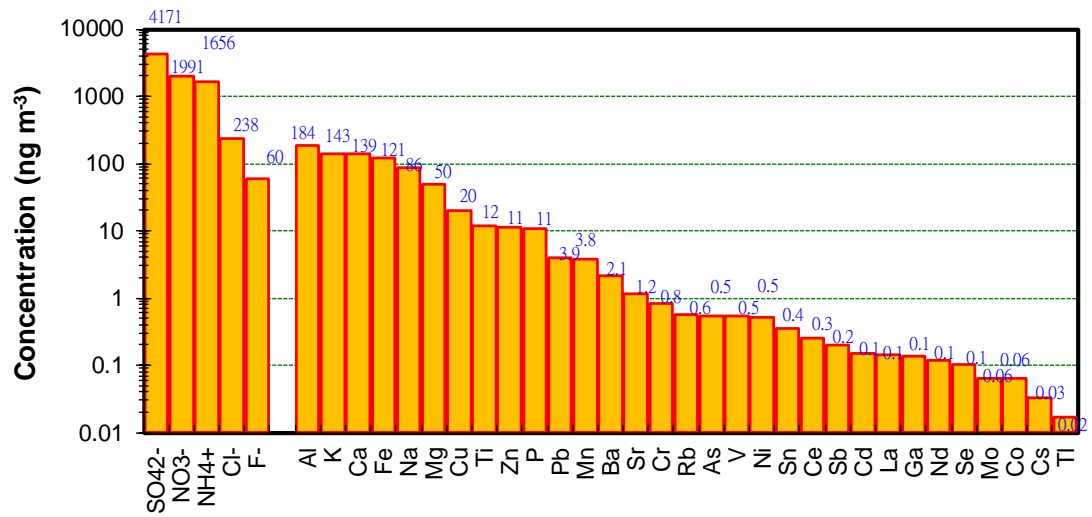

**Figure 3**



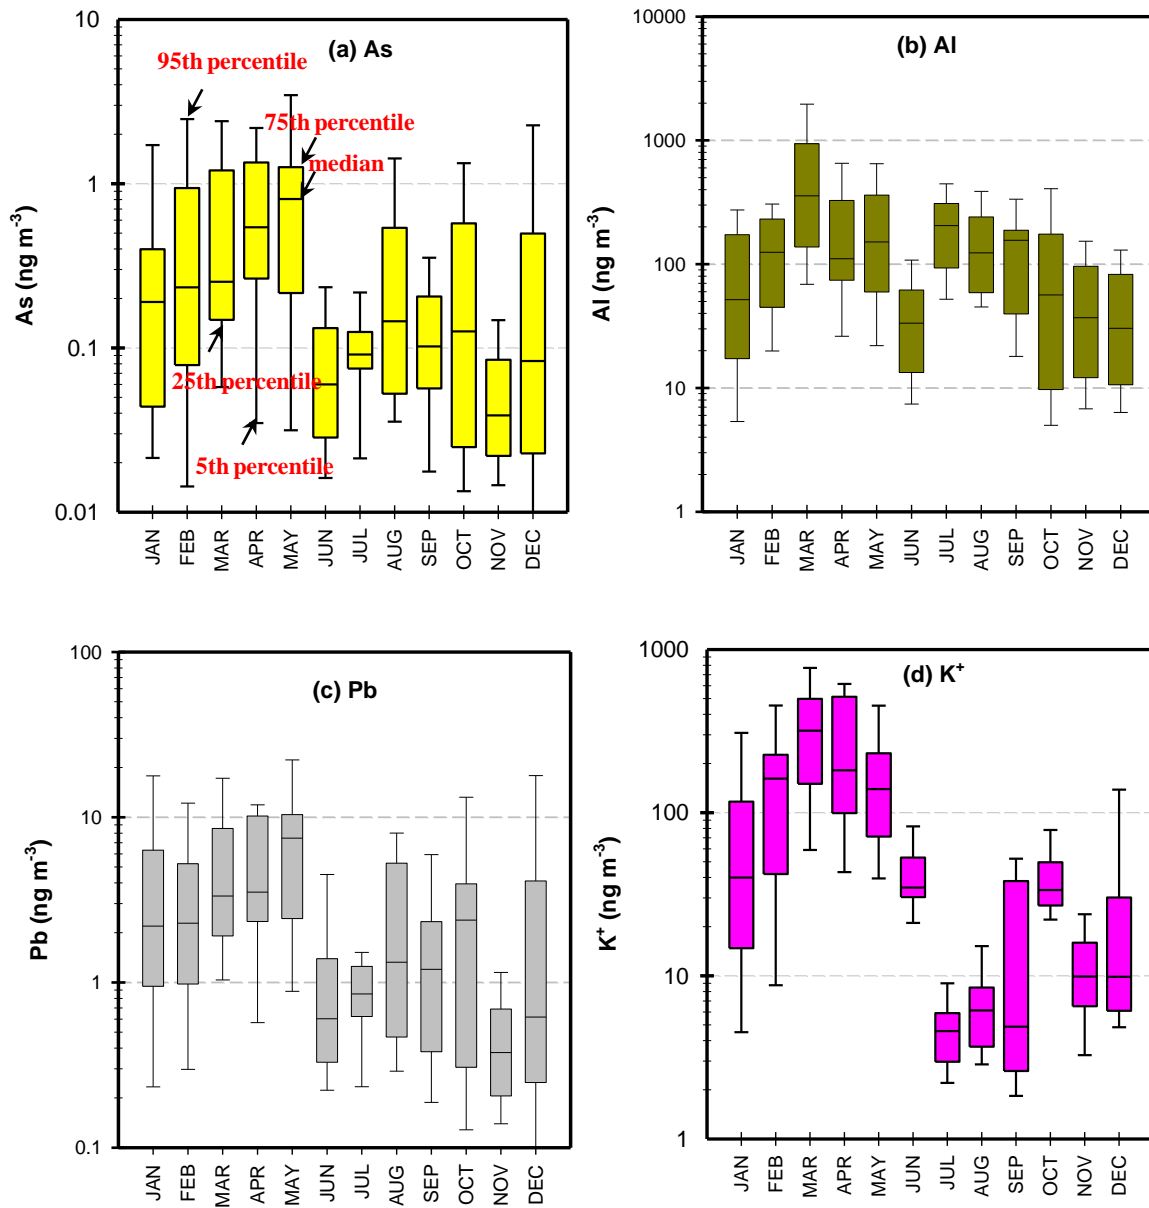

**Figure 4**

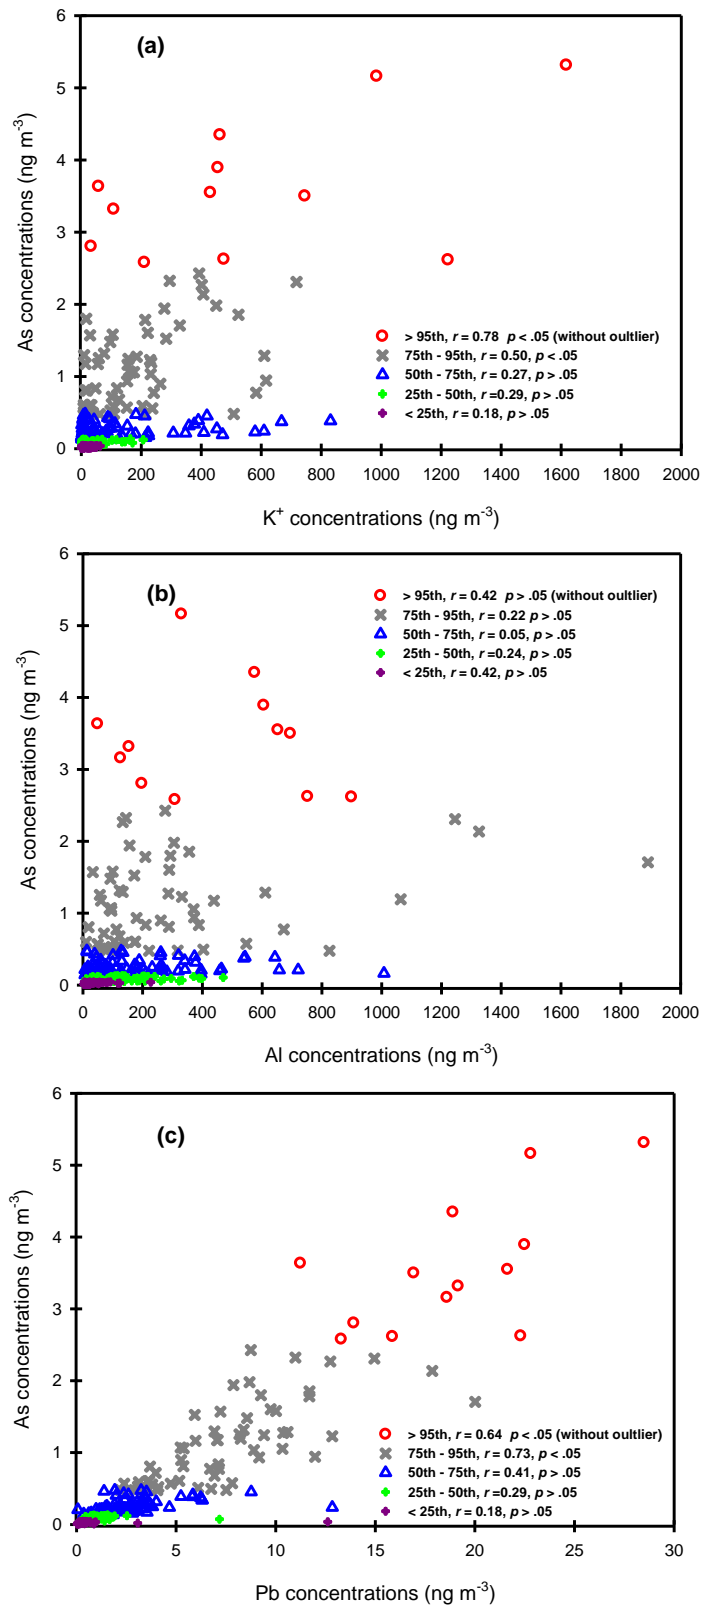

Figure 5

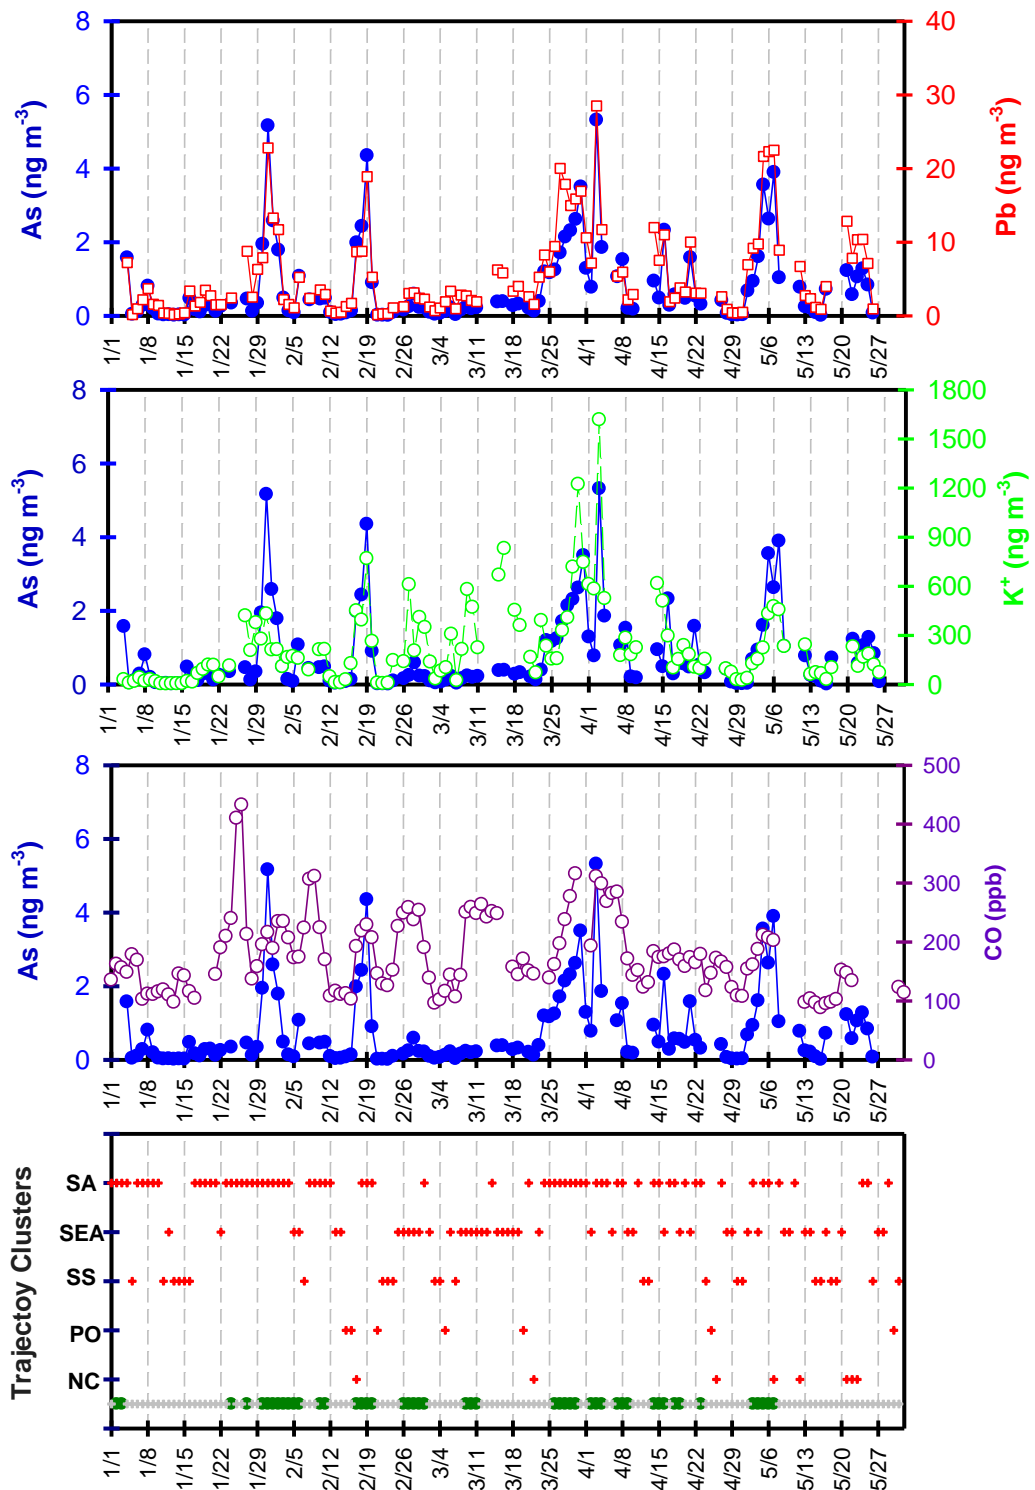

Figure 6

(a)

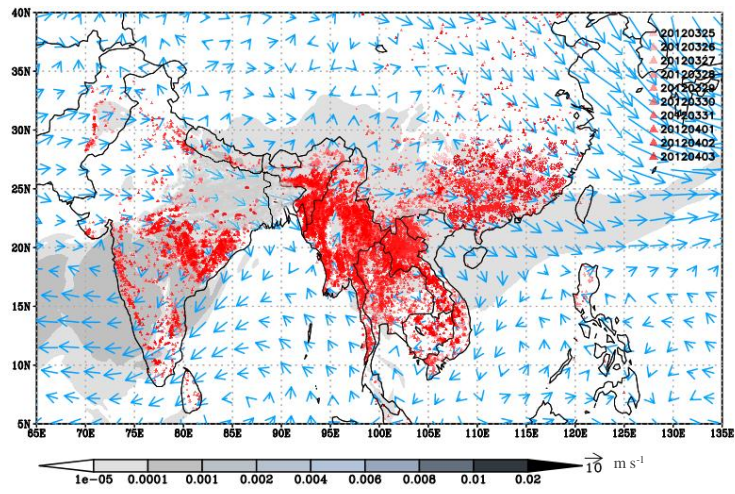

(b)

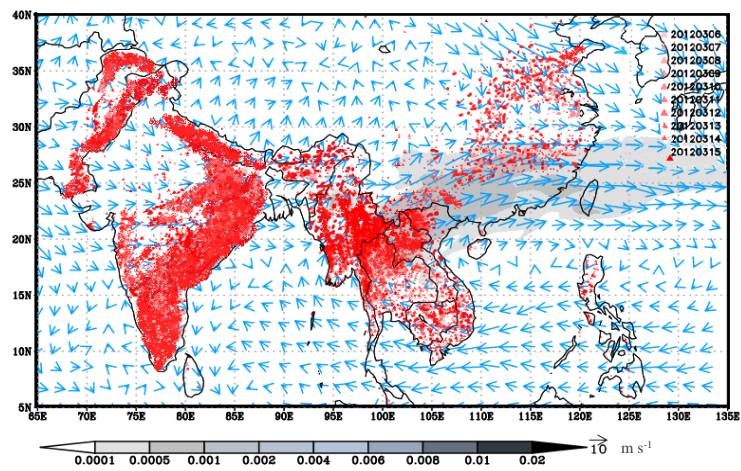

Figure 7

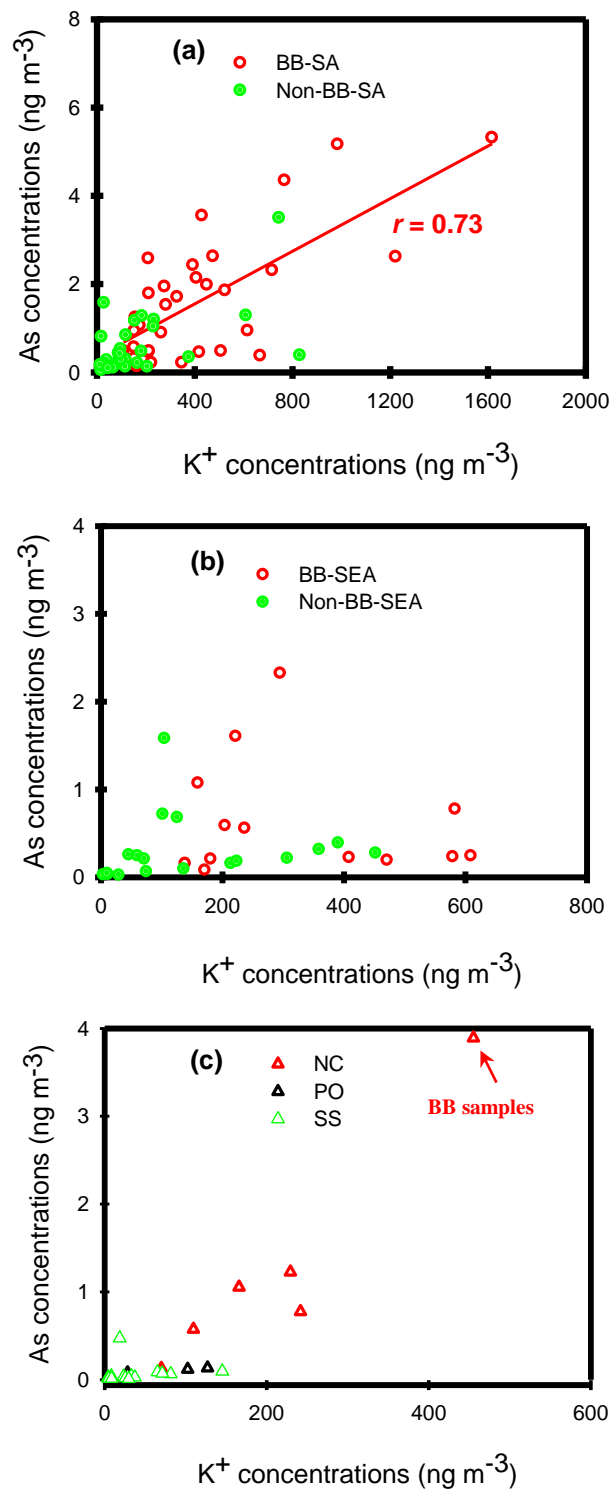

**Figure 8**

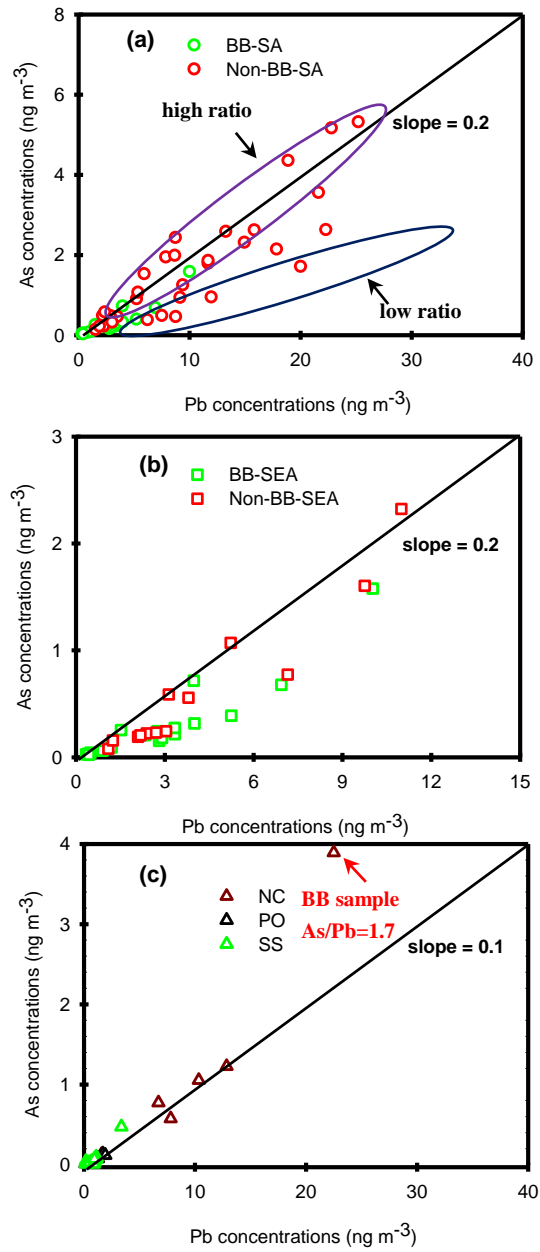

Figure 9

## Supplementary Materials

### Enhancements of Airborne Particulate Arsenic over the Subtropical Free Troposphere: Impact by South Asian Biomass Burning

Yu-Chi Lin<sup>1,2,3</sup>, Shih-Chieh Hsu<sup>3</sup>, Chuan-Yao Lin<sup>3</sup>, Shuen-Hsin Lin<sup>3</sup>, Yi-Tang  
Huang<sup>3</sup>, Yunhua Chang<sup>1,2</sup>, Yan-Lin Zhang<sup>1,2\*</sup>

<sup>1</sup> *Yale-NUIST Center on Atmospheric Environment, Nanjing University of Information  
Science and Technology, Nanjing, Jiangsu, China.*

<sup>2</sup> *Key Laboratory of Meteorological Disaster, Ministry of Education & Collaborative  
Innovation Center on Forecast and Evaluation of Meteorological Disasters, Nanjing  
University of Information Science and Technology, Nanjing, Jiangsu, China.*

<sup>3</sup> *Research Center for Environmental Changes (RCEC), Academia Sinica, Taipei,  
Taiwan, R.O.C.*

*Corresponded to Yan-Lin Zhang (zhangyanlin@nuist.edu.cn ;*

*dryanlinzhang@outlook.com)*

This “Supplementary Materials” contains one table and five figures. Table S1 lists the average concentrations of chemical species in TSP samples observed at Mount Hehuan in different air clusters. Figure S1 plots time series of daily concentrations of airborne As, Pb and K<sup>+</sup> in TSP along with CO observed at Mount Hehuan from September 2011 to September 2012. Figure S2 reveals monthly distributions of MODIS fire spots observed over southeast (SE) Asia and south (S) Asia from September 2011 to September 2012. Figure S3 shows five-day backward trajectories observed at Mount Hehuan in different BB cases. Figure S4 five-day backward

trajectory at Mount Hehuan from (a) March 25 to April 3, 2012 and (b) March 8 to 15, 2012. Figure S5 illustrates the scattered plots of As against Al observed at Mount Hehuan in (a)SA, (b)SEA and (c)other air groups during the SE and S Asian biomass burning seasons.



Table S1 The average concentrations of chemical species in TSP samples observed at Mount Hehuan in different air clusters. The units of all species are in  $\text{ng m}^{-3}$ .

|                               | NC     | PO    | SS    | SEA    | SA     |
|-------------------------------|--------|-------|-------|--------|--------|
| Al                            | 178.9  | 145.0 | 53.6  | 145.9  | 295.8  |
| Fe                            | 117.8  | 82.2  | 37.0  | 94.6   | 203.5  |
| Na                            | 89.9   | 62.1  | 49.1  | 88.1   | 116.1  |
| Mg                            | 46.4   | 20.1  | 13.7  | 35.8   | 94.4   |
| K                             | 136.8  | 87.0  | 49.3  | 147.4  | 223.6  |
| Ca                            | 139.1  | 77.6  | 43.8  | 86.3   | 252.9  |
| Sr                            | 1.0    | 0.5   | 0.3   | 0.7    | 2.3    |
| Ba                            | 2.5    | 2.0   | 1.0   | 1.7    | 3.0    |
| Ti                            | 11.4   | 7.2   | 3.6   | 9.3    | 20.6   |
| Mn                            | 4.7    | 2.1   | 1.1   | 3.0    | 6.4    |
| Co                            | 0.1    | 0.1   | 0.0   | 0.0    | 0.1    |
| Ni                            | 0.6    | 0.6   | 0.2   | 0.4    | 0.6    |
| Cu                            | 27.0   | 15.6  | 20.0  | 21.8   | 20.9   |
| Zn                            | 18.2   | 12.3  | 6.1   | 8.2    | 13.0   |
| Mo                            | 0.1    | 0.1   | 0.0   | 0.1    | 0.1    |
| Cd                            | 0.2    | 0.0   | 0.0   | 0.1    | 0.3    |
| Sn                            | 0.6    | 0.2   | 0.1   | 0.3    | 0.5    |
| Sb                            | 0.3    | 0.1   | 0.1   | 0.2    | 0.3    |
| Tl                            | 0.0    | 0.0   | 0.0   | 0.0    | 0.0    |
| Pb                            | 5.0    | 1.1   | 0.8   | 2.8    | 7.7    |
| V                             | 0.6    | 0.3   | 0.2   | 0.6    | 0.8    |
| Cr                            | 0.9    | 0.9   | 0.5   | 0.5    | 1.0    |
| As                            | 0.6    | 0.1   | 0.1   | 0.4    | 1.2    |
| Se                            | 0.2    | 0.0   | 0.0   | 0.1    | 0.1    |
| Ge                            | 0.0    | 0.0   | 0.0   | 0.0    | 0.0    |
| Rb                            | 0.6    | 0.3   | 0.2   | 0.5    | 1.0    |
| Cs                            | 0.0    | 0.0   | 0.0   | 0.0    | 0.1    |
| Ga                            | 0.2    | 0.1   | 0.0   | 0.1    | 0.2    |
| La                            | 0.1    | 0.1   | 0.0   | 0.1    | 0.2    |
| Ce                            | 0.2    | 0.2   | 0.1   | 0.2    | 0.4    |
| Nd                            | 0.1    | 0.1   | 0.0   | 0.1    | 0.2    |
| P                             | 51.4   | 32.8  | 28.8  | 32.6   | 29.9   |
| NH <sub>4</sub> <sup>+</sup>  | 659.3  | 53.5  | 143.9 | 663.0  | 1064.5 |
| K <sup>+</sup>                | 71.2   | 4.5   | 24.5  | 116.6  | 198.8  |
| F <sup>-</sup>                | 14.8   | 2.6   | 6.7   | 27.6   | 36.4   |
| Cl <sup>-</sup>               | 84.4   | 16.9  | 79.7  | 126.2  | 163.0  |
| SO <sub>4</sub> <sup>2-</sup> | 1935.5 | 141.2 | 328.4 | 1486.7 | 3049.0 |
| NO <sub>3</sub> <sup>-</sup>  | 490.4  | 48.9  | 188.1 | 882.7  | 1212.9 |

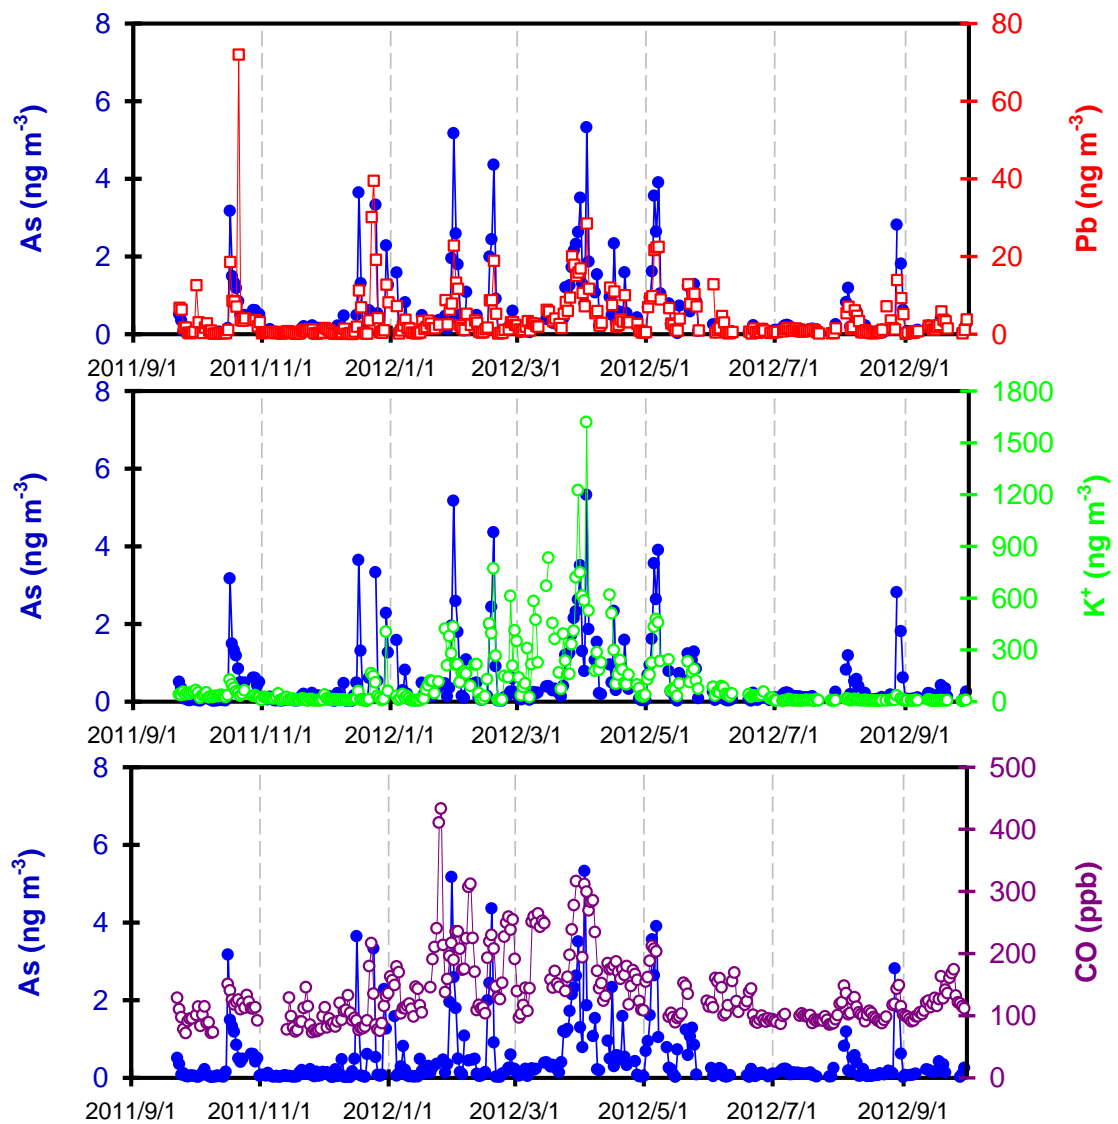

Figure S1 Time series of daily concentrations of airborne As, Pb and K<sup>+</sup> in TSP along with CO observed at Mount Hehuan from September 2011 to September 2012.

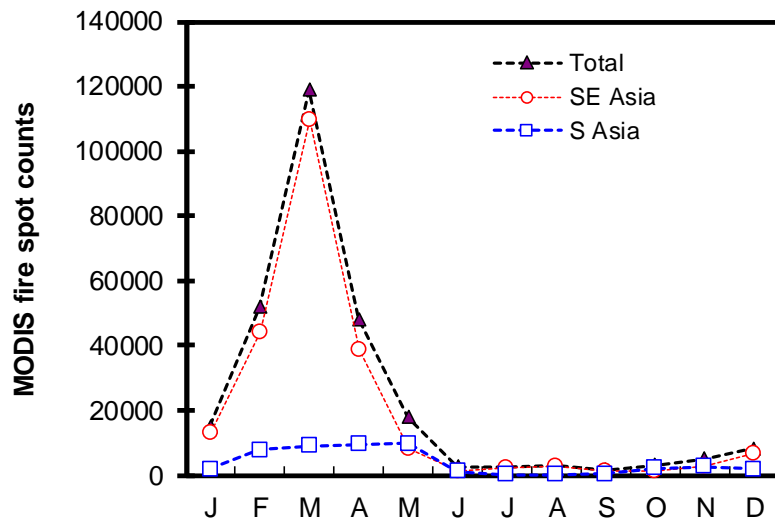

Figure S2 Monthly distributions of MODIS fire spots observed over southeast (SE) Asia and south (S) Asia. The total fire spots in the figure means the summation of fire spots observed over SE Asia and S Asia. The SE Asia region is identified the Indo-China Peninsula ranging from 5 to 30 °N and 90 to 110 °E; The S Asia region identified the Indian Subcontinent ranging from 5 to 38 °N and 65 to 90 °E.

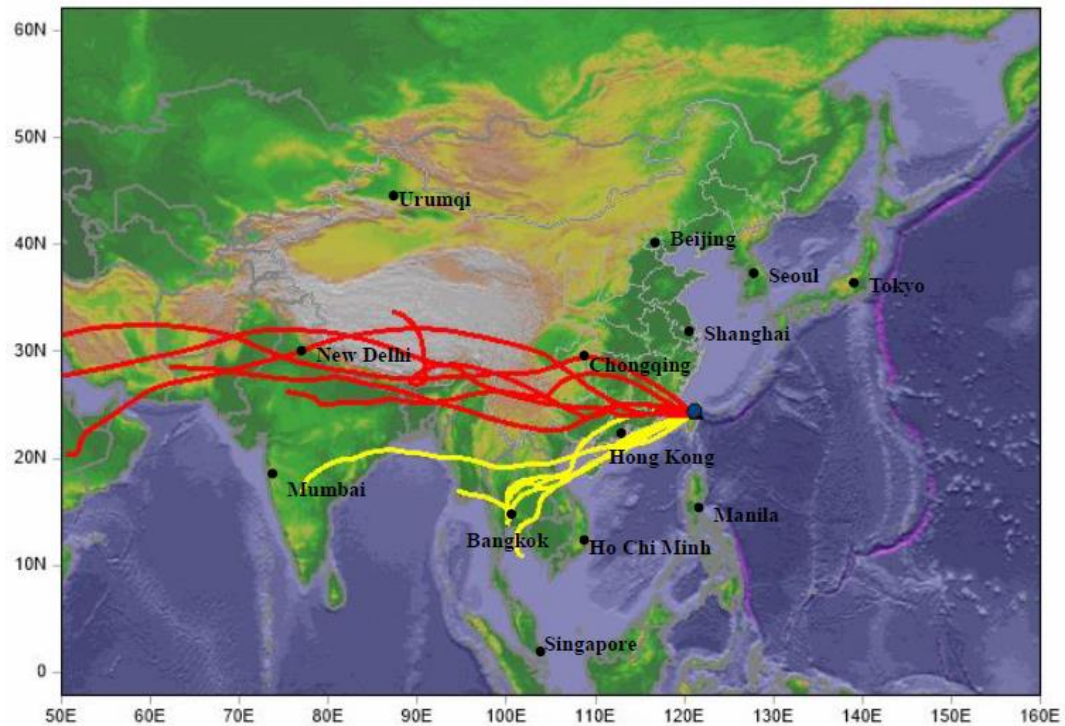

Figure S3 Five-day backward trajectories observed at Mount Hehuan in different BB cases. The trajectories were computed at 12:00 LT (local time) once every day with a time step of 6 hours. The red lines denote the air parcels on Feb. 19, Mar. 30, Mar. 31, Apr. 3, May 5 and 7, 2012 (with high As plumes). The yellow ones represent the air masses from Feb. 25 to 28 and March 15, 2012 (with low As concentrations).

(a)

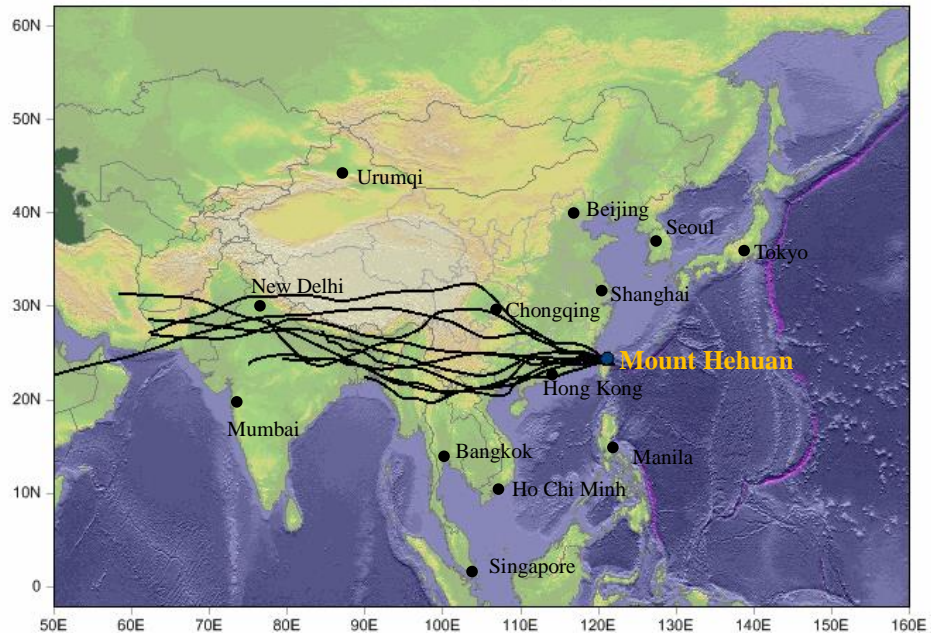

(b)

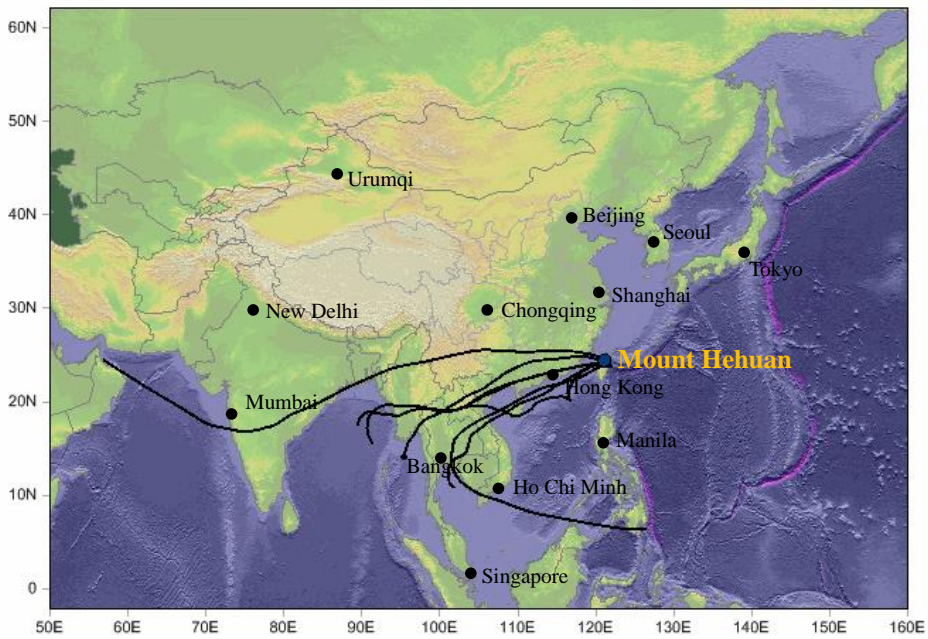

Figure S4 Five-day backward trajectory at Mount Hehuan from (a) March 25 to April 3, 2012 and (b) March 8 to 14, 2012. The trajectories were computed at 12:00 LT (local time) once every day with a time step of 6 hours.

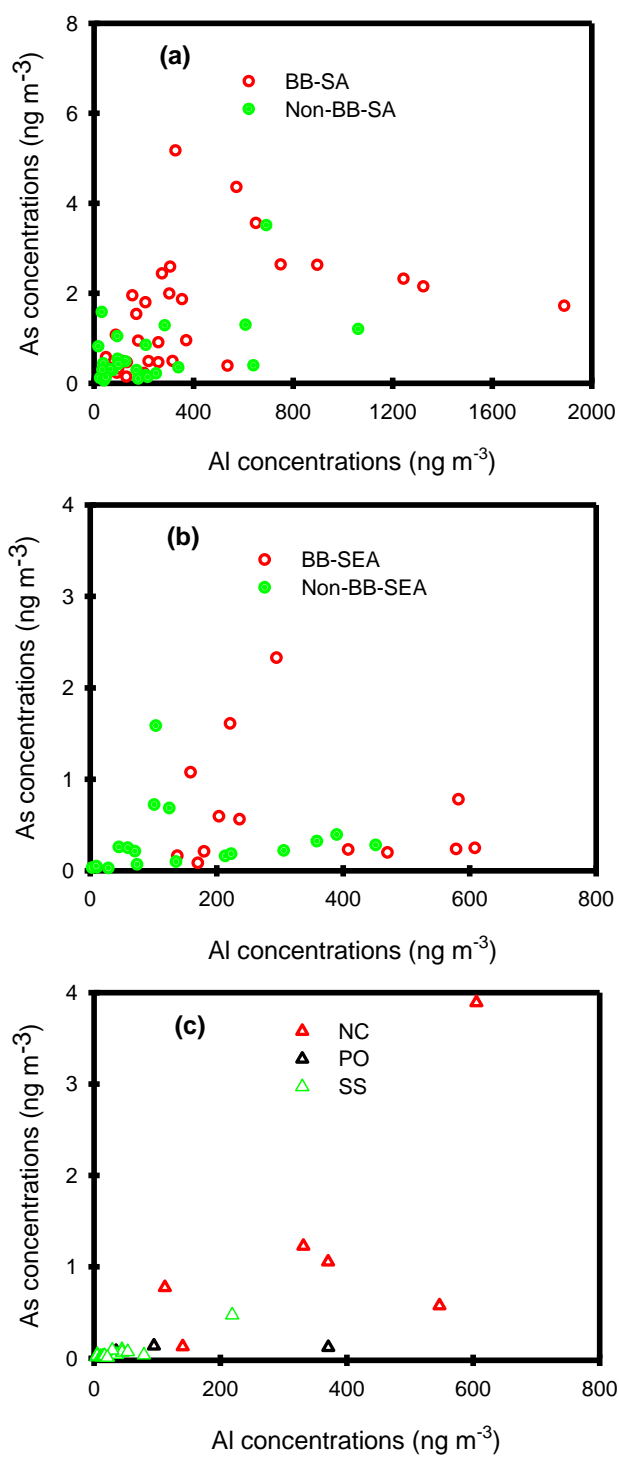

Figure S5 The scattered plots of As against Al observed at Mount Hehuan in (a)SA, (b)SEA and (c)other air groups during the SE and S Asian biomass burning seasons (January to May, 2012).
